# Supplementary material for: Surface state engineering of molecule–molecule interactions
Source: Royal Society of Chemistry journal article supplement (doi:10.1039/c2cp40254h), 2012-01-01
Supplement: c2cp40254h.pdf [file c2cp40254h.pdf]

### Section 1: Computational Details

The DFT-D calculations were carried out using the ADF software package<sup>1,2</sup>. The revPBE gradient density functional<sup>3-6</sup> was employed, and Grimme's latest dispersion corrected functional<sup>7</sup> was used to account for the dispersion forces. Tests were performed to determine the effect of the basis set on the binding energy of benzene to an Ag(111) slab, see Section 3 below. For the results given in the main text, the basis functions on all of the atoms consisted of a valence triple- $\zeta$  Slater-type basis set with polarization functions (TZP) from the ADF basis-set library. The core shells up to 1s, 1s, 3p and 4p of carbon, nitrogen, copper and silver, respectively, were kept frozen. In situations where SCF convergence issues arose, the steepest decent method was employed. Both a Mulliken and a Hirshfeld charge analysis were used to determine the magnitude of the charge transferred between the adsorbate and the metal surface.

The Cu(111) and Ag(111) surfaces were simulated by using a finite slab, or cluster, comprised of 166 metal atoms and the experimental lattice parameter of 3.614 Å<sup>8</sup> and 4.086 Å<sup>8</sup>, respectively. The clusters were composed of two layers with the top layer containing 91 atoms and the bottom layer containing 75 atoms. During the structural relaxation, the top layer of the slabs was allowed to relax. Next, a geometry optimization was performed where the 2H-TPP was placed on-top of the optimized metal surface, and the coordinates of the cluster atoms were kept fixed. This procedure was found to give binding energies (BEs) in reasonable agreement with experimental data obtained for benzene adsorbed on Ag(111)/Cu(111) (see Section 3 of the Supplementary Information, SI). For select systems, the basis set superposition error (BSSE) was calculated using the Counterpoise method.

To clarify the nature of the bonding, a fragment orbital analysis was employed using the ADF program<sup>1</sup>. The fragments used were those of the metal cluster and distorted adsorbate (as found in the optimized structures **S3**, **S5**, **S6** and **S7**). The composition of the molecular orbitals of the metal-adsorbate system was decomposed into terms of occupied and unoccupied orbitals of the finite metal cluster and of the adsorbate. From this analysis, charge density difference (CDD) contours and isosurfaces were plotted using the ADFview program. The CDD given below are the calculated differences between the charge density of the metal-organic systems and that of the isolated fragments. They illustrate how the charge density changes upon adsorption of the molecule to the metal surface.

## Section 2: 2H-TPP Dimer Binding Energies

The coordinates for the adjacent 2H-TPP dimer (**S1**) and the sandwich 2H-TPP dimer (**S2**) can be found in Section 5 of the SI. The basis functions on all of the atoms consisted of a valence triple- $\zeta$  Slater-type basis set with polarization functions (TZP) from the ADF basis-set library. The core shells up to 1s of carbon and nitrogen were kept frozen. The binding energy (BE) of **S1** was calculated as being 0.03 eV. The binding energy of **S2** was found to be 1.12 eV.

**Figure 1:** Illustrations of the geometries of the (a) adjacent (**S1**), and (b) sandwich (**S2**) 2H-TPP dimer.

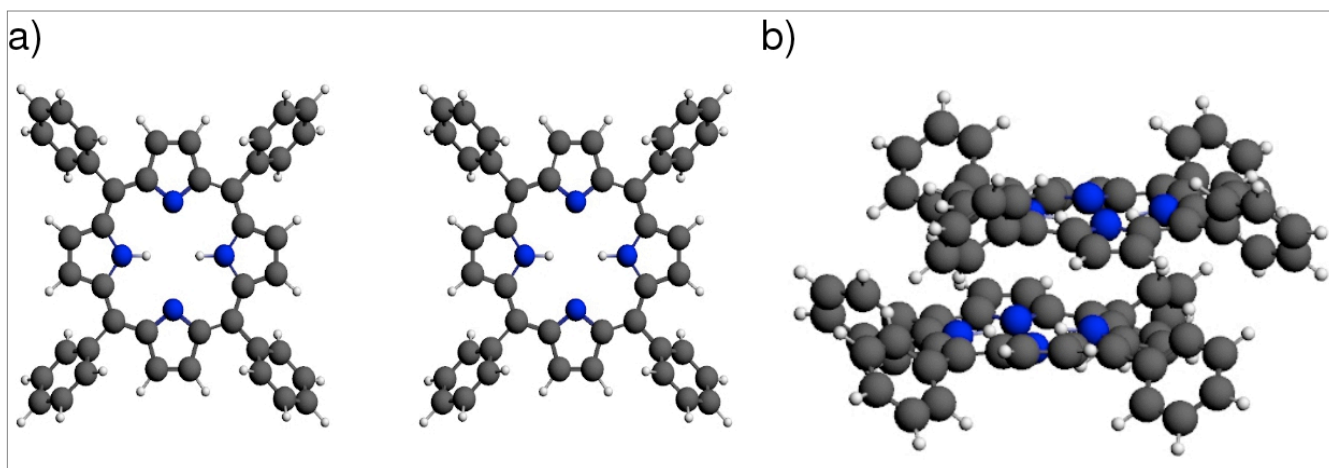

The most stable benzene dimer (**S8**)<sup>9</sup> has a geometry which is very similar to that of **S2**. Using the computational settings described herein, the binding energy for the benzene dimer was found to be 0.05 eV, which is somewhat smaller than that computed by high-level CCSD(T) calculations<sup>9</sup> for the parallel-displaced benzene dimer (0.09 to 0.12 eV).

## Section 3: Benzene on Various Copper/Silver Surfaces

The geometries of benzene adsorbed to metal clusters (models for various metal surfaces) were optimized, and the BEs computed. In the following geometry optimizations the bottom layer of metal atoms was kept fixed, but the top layer of atoms was allowed to relax. For benzene adsorbed on the Ag(111) surface computations were performed using different basis sets, and varying the number of atoms in the cluster. The BE, given below in Table 1, were calculated by:

$$BE = E_{(\text{Organic Molecule})} + E_{(\text{Metal Slab})} - E_{(\text{Organic-Metal Complex})} \quad (1)$$

**Table 1:** The binding energy (BE) of benzene to Ag(111) using various basis sets and slab sizes<sup>a</sup>

| System                             | # of Surface Atoms | Adsorbate Basis | Surface Basis | BE (eV) |
|------------------------------------|--------------------|-----------------|---------------|---------|
| Benzene-Ag(111)                    | 64                 | DZP             | DZ            | 1.16    |
| Benzene-Ag(111)                    | 64                 | TZP             | DZ            | 0.98    |
| Benzene-Ag(111)                    | 64                 | DZP             | TZP           | 1.10    |
| Benzene-Ag(111)                    | 64                 | TZP             | TZP           | 0.87    |
| Benzene-Ag(111)                    | 166                | TZP             | TZP           | 0.77    |
| <b>Experimental BE<sup>7</sup></b> |                    |                 |               | 0.56    |

<sup>a</sup> DZ denotes a double- $\zeta$  basis; DZP is a double- $\zeta$  basis with polarization functions; TZP is a triple- $\zeta$  basis set with polarization functions.

A TZP basis set on the adsorbate atoms and the surface atoms was found to give a BE which was closest to the experimental values. Moreover, as the number of atoms used to simulate the metallic slab increased, the computed BE was found to approach the experimental BE.

The computed BE between benzene and various copper/silver surfaces are given below in Table 2. The results shown in Table 1 and 2 illustrate that computational method employed overestimates the BE for these types of systems, in-line with the original benchmark calculations<sup>7</sup>. The BSSE lowers the computed BEs slightly. For example, the BSSE-corrected BE of benzene on Cu(111) and Ag(111) with 64 atoms in the cluster was found to be 1.11 and 0.79 eV, respectively.

The optimized coordinates of the Ag(111)-benzene system with 64 silver atoms (**S3**), the Ag(111)-benzene system with 166 silver atoms (**S4**), and the Cu(111)-benzene system (**S5**) can be found in Section 5 of the SI.

**Table 2:** The binding energy (BE) of benzene to various copper and silver surfaces<sup>a</sup>

| System                       | Calculated BE (eV) | Experimental BE (eV) |
|------------------------------|--------------------|----------------------|
| Cu(100)-Benzene <sup>b</sup> | 1.03               | -                    |
| Cu(110)-Benzene <sup>c</sup> | 1.27               | 0.73 <sup>10</sup>   |
| Cu(111)-Benzene <sup>d</sup> | 1.28               | 0.59 <sup>11</sup>   |
| Ag(100)-Benzene <sup>b</sup> | 0.67               | -                    |
| Ag(111)-Benzene <sup>d</sup> | 0.87               | 0.56 <sup>7</sup>    |

<sup>a</sup> TZP basis sets were used for all of the atoms; <sup>b</sup> Slab contained 74 atoms; <sup>c</sup> Slab contained 134 atoms;

<sup>d</sup> Slab contained 64 atoms.

The differences between the charge densities of the isolated fragments and that of the metal-adsorbate system were calculated. In the charge density difference (CDD) isosurfaces provided herein, red denotes a gain of electrons, and blue a loss of electrons upon adsorption. Charge density difference isosurfaces were calculated for the **S3** and **S5** structures (Figures 2a and 2b).

Figure 2b is illustrative of the “Pillow Effect”, which is caused by Pauli repulsion between the metal and adsorbate electron densities<sup>12</sup>. The charge redistribution is also a result of electron donation from the HOMO of benzene to the metal surface, and back-donation from the surface to the benzene LUMO (the Dewar, Chatt, and Duncason model which has, for example, been applied to benzene on Cu(110)<sup>13</sup>). A Mulliken analysis illustrates that for both **S3** and **S5** there is a charge transfer of 0.19e to the metal cluster, whereas the Hirschfeld scheme yields 0.16e, and 0.27e for Ag(111) and Cu(111), respectively. Mulliken charges are strongly basis set dependent, and the Hirschfeld method may provide results which are more in-line with chemical intuition since the promolecular fragments are the same as those employed in our CDD calculations. The benzene to Ag/Cu surface distance was found to be 3.84/2.76 angstroms. The closer the adsorbate is to the metal, the stronger the binding energy and the more pronounced is the CDD.

**Figure 2:** Charge density difference (CDD) isosurfaces of benzene on an: (a) Ag(111) (S3), and (b) Cu(111) slab (S5). The slabs contained 64 atoms and the isovalues are +/- 0.0003 au.

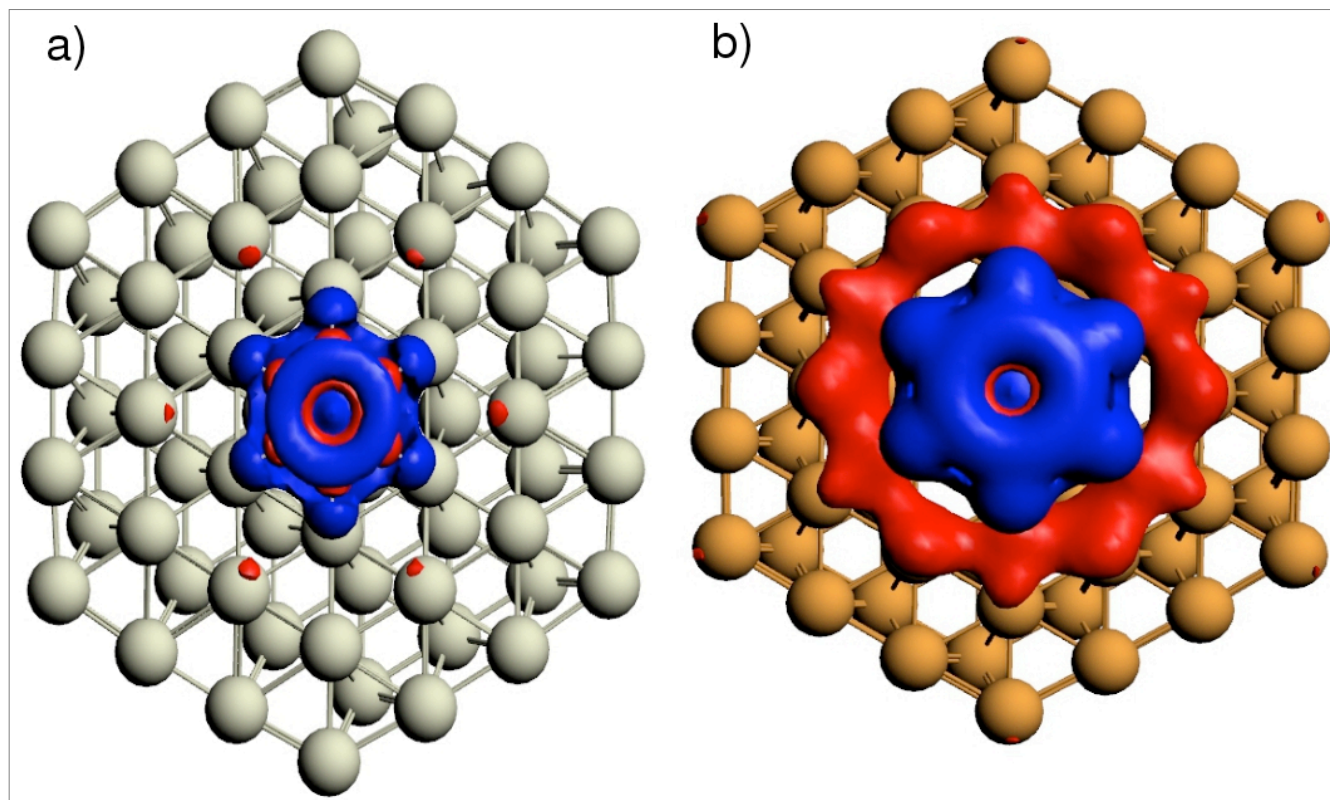

#### Section 4: Cu(111)/2H-TPP and Ag(111)/2H-TPP

Geometry optimizations were performed as previously described in Section 1, with the Cu(111) and Ag(111) clusters both containing 166 atoms. The coordinates of the following systems can be found in Section 5, and the BE are given in Table 3.

**Table 3:** Binding energies (BE) and structural parameters of 2H-TPP with Cu(111) and Ag(111)<sup>a</sup>

| System  | BE (eV) <sup>b</sup> | Surface Charge (Mulliken) | Surface Charge (Hirschfeld) | Dihedral | N1-surface Distance (Å) | N2-Surface Distance (Å) |
|---------|----------------------|---------------------------|-----------------------------|----------|-------------------------|-------------------------|
| Cu(111) | 6.19/5.31            | -1.69e                    | -0.89e                      | 38.3     | 3.05                    | 3.05                    |
| Ag(111) | 3.44/3.07            | -1.45e                    | -0.46e                      | 42.1     | 3.30                    | 3.29                    |

<sup>a</sup> The atoms C1, C2, C3 and C4 which define the dihedral angle given are illustrated in Figure 3. The N1 and N2 atoms are defined in Figure 3.

<sup>b</sup> The uncorrected/BSSE corrected binding energies.

**Figure 3:** The carbon atoms which define the dihedral angle, and the nitrogen atoms given in Table 3.

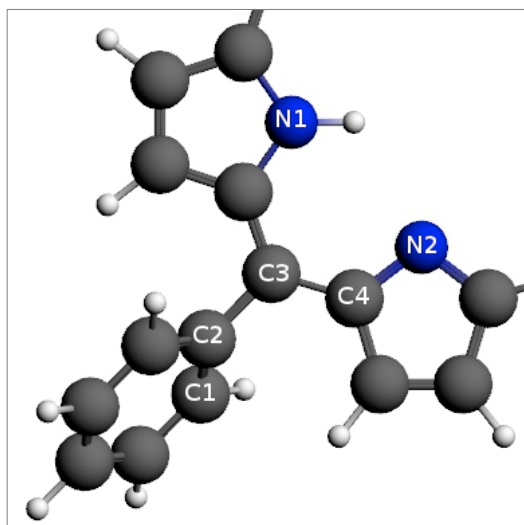

**Figure 4:** Charge density difference (CDD) isosurfaces of 2H-TPP on an: (a) Cu(111) (S6), and (b) Ag(111) slab (S7). The slabs contained 166 atoms and the isovalues are +/- 0.0003 au.

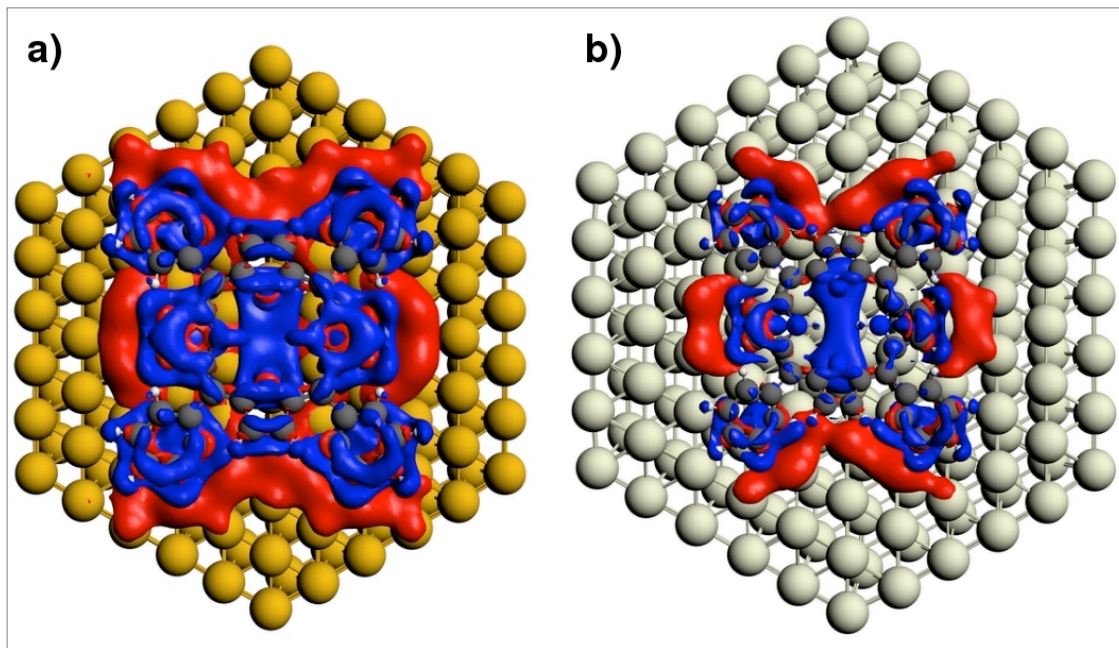

**Table 4:** Bonding Energy (eV) decomposition analysis for 2H-TPP on Cu(111) and Ag(111).

| System  | Pauli | Electrostatic | Steric Interaction | Orbital Interaction | Dispersion | Geometric Distortion |
|---------|-------|---------------|--------------------|---------------------|------------|----------------------|
| Cu(111) | 15.27 | -7.84         | 7.43               | -5.07               | -9.15      | 0.62                 |
| Ag(111) | 8.60  | -4.44         | 4.16               | -2.36               | -5.70      | 0.53                 |

|   |  |  |  |  |  |  |
|---|--|--|--|--|--|--|
| ) |  |  |  |  |  |  |
|---|--|--|--|--|--|--|

The 2H-TPP molecule distorts as it approaches the Cu(111) and Ag(111) surfaces. The phenyl arms rotate so that the dihedral angle, as defined in Figure 3, changes (for free 2H-TPP we compute the dihedral angle to be 62.7 degrees). In both cases the phenyl arms are oriented nearly parallel to the metal surface, with an angle of 26/30 degrees to Cu(111)/Ag(111). The ends of the pyrrole rings that contain N1 distort downwards, and the pyrrole rings that contain N2 distort upwards due to the rotation of the phenyl arms of the 2H-TPP.

In accordance with our findings for benzene on Ag(111)/Cu(111), the Mulliken charges for the two systems were about the same even though visual inspection of the CDD (Figures 4 and 5) appears to indicate a larger charge redistribution and charge build-up on the Cu surface. The Hirschfeld charge analysis, on the other hand, shows that there is a larger amount of charge transferred to Cu(111) than to Ag(111) suggesting that the repulsion between the positively charged 2H-TPP molecules may hinder their self-assembly. It is likely that the Hirschfeld scheme provides better results for the systems we are considering<sup>19</sup>.

The BSSE uncorrected bonding energy can be decomposed as<sup>14</sup>:

$$BE = DE_{\text{bond}} = DE_{\text{geo}} + DE_{\text{steric}} + DE_{\text{oi}} + DE_{\text{disp}} \quad (2)$$

where  $DE_{\text{geo}}$  is the energy necessary to distort the geometry of the 2H-TPP to the one in the total system,  $DE_{\text{steric}}$ , the steric repulsion, is a sum of the Pauli repulsion and the classical electrostatic interaction between the interpenetrating charge densities of the fragments,  $DE_{\text{oi}}$  is the orbital interaction and  $DE_{\text{disp}}$  the dispersion energy. These values are provided in Table 4.

The distances between N1 and N2 and the metal surface is larger for the Ag(111) than for the Cu(111) slab, and the resulting charge redistribution upon absorption is smaller as evidenced in Figures 4 and 5. The stronger adsorbate-metal interaction for the Cu(111) system correlates with the larger magnitude of the steric, orbital and dispersion interaction energies, and the larger energy necessary to distort the 2H-TPP molecule as it adsorbs to the metal surface.

To clarify the nature of the bonding between 2H-TPP and Cu(111)/Ag(111), we calculated the composition of the molecular orbitals (MOs) in terms of the occupied and unoccupied MOs of the molecule and the metal cluster. Based upon the results of this analysis approximate interaction diagrams, provided in Fig. 6, can be constructed using the thinking outlined in Refs. [15-18].

These diagrams illustrate that the bonding is similar to benzene, with charge transfer from the 2H-TPP HOMO to the surface, and back donation into the 2H-TPP LUMO. Because of the shorter metal-adsorbate distance, the dispersion of the HOMO/metal and LUMO/metal bands is larger for Cu(111). The calculation of the crystal orbital overlap population (COOP) would be necessary for a more in-depth analysis of the bonding in the two systems.

**Figure 5:** Charge density difference (CDD) contours of 2H-TPP on an: (a) Cu(111) (S6), and (b) Ag(111) slab (S7). The slabs contained 166 atoms, and the settings used to obtain the contours in both plots was the same.

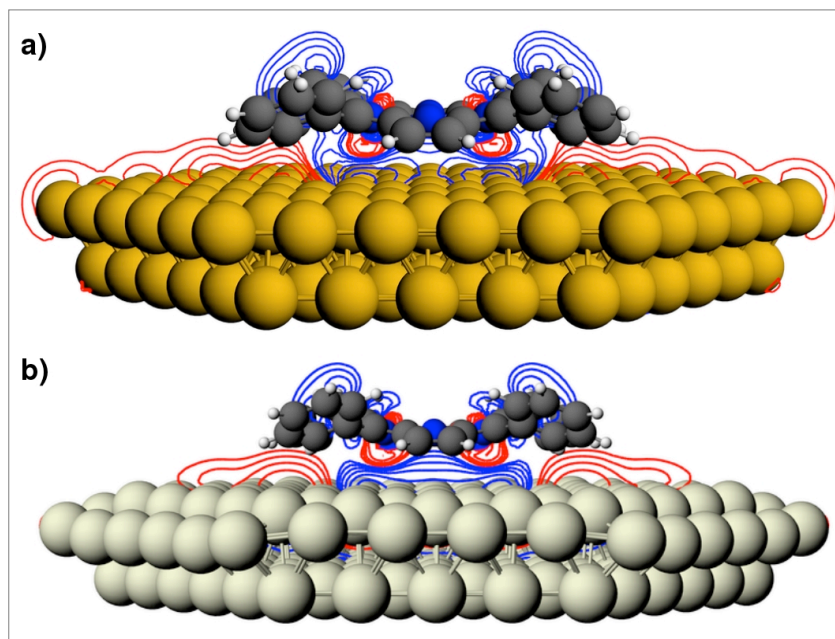

**Figure 6:** Schematic interaction diagram of 2H-TPP with the a) Ag(111) and b) Cu(111) surface. The Fermi level has been set to zero. Isosurfaces of the HOMO and LUMO of the 2H-TPP molecule ( $\pm 0.03$  a.u.) are displayed in red/pink and green/yellow. The blue/red rectangles represent the width of the bands formed from the overlap of metal bands with the 2H-TPP HOMO/LUMO. On Cu some of the metal/LUMO bands are off the scale of this figure, as denoted by the dashed line. Note that the bandwidths of the metals extend to higher/lower energies.

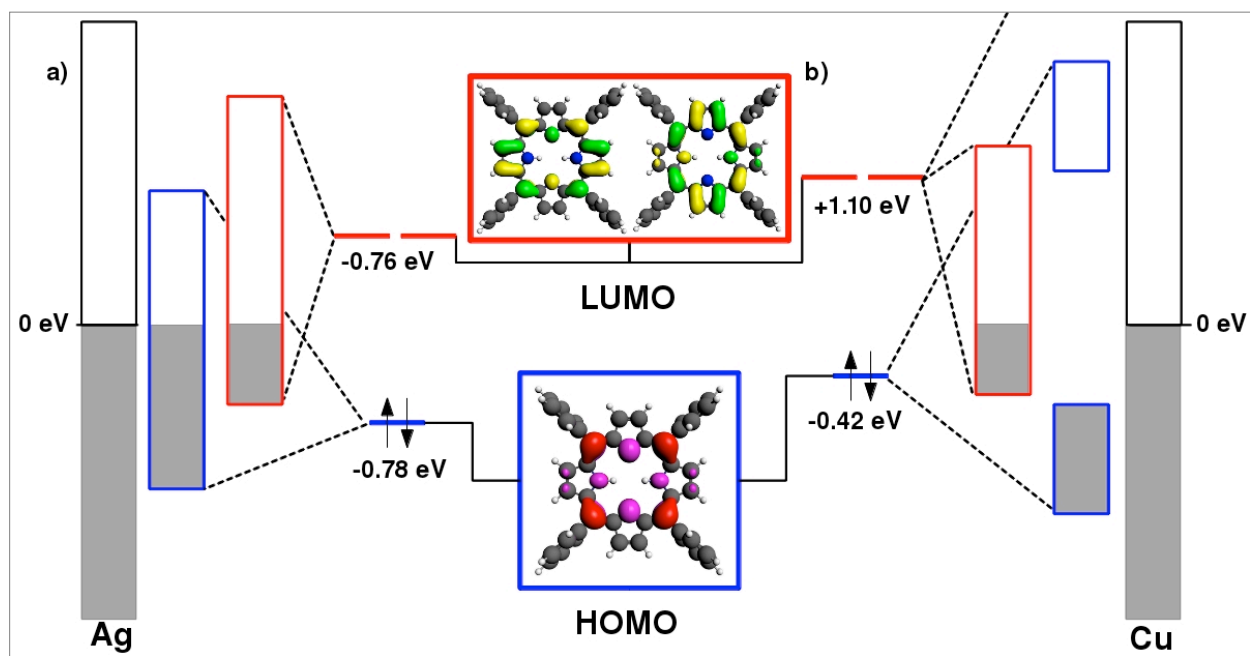



## Section 5: Coordinates

### S1-Adjacent 2H-TPP Dimer

E= -1043.98775848 eV Symmetry: C<sub>2v</sub>

|   |            |           |           |   |           |           |           |
|---|------------|-----------|-----------|---|-----------|-----------|-----------|
| H | -14.632016 | -6.294225 | 0.013682  | H | -6.990332 | -5.130155 | -0.207176 |
| H | -14.632016 | 6.294225  | 0.013682  | H | -6.990332 | 5.130155  | -0.207176 |
| C | -13.855608 | -5.525492 | 0.006242  | N | -6.216737 | 0.000000  | -0.035577 |
| C | -13.855608 | 5.525492  | 0.006242  | C | -5.887630 | -2.471290 | 0.006142  |
| H | -13.467074 | 1.347669  | 0.173646  | C | -5.887630 | 2.471290  | 0.006142  |
| H | -13.467074 | -1.347669 | 0.173646  | C | -5.432601 | -1.136302 | 0.017972  |
| H | -14.458660 | -4.700141 | -1.906099 | C | -5.432601 | 1.136302  | 0.017972  |
| H | -14.458660 | 4.700141  | -1.906099 | C | -4.829672 | -3.534150 | 0.021180  |
| C | -13.759877 | -4.629054 | -1.069030 | C | -4.829672 | 3.534150  | 0.021180  |
| C | -13.759877 | 4.629054  | -1.069030 | H | -4.003367 | -2.972578 | -1.892724 |
| C | -12.947725 | -5.428541 | 1.071674  | H | -4.003367 | 2.972578  | -1.892724 |
| C | -12.947725 | 5.428541  | 1.071674  | C | -3.920522 | -3.658534 | -1.047367 |
| H | -13.017334 | -6.119126 | 1.915801  | C | -3.920522 | 3.658534  | -1.047367 |
| H | -13.017334 | 6.119126  | 1.915801  | C | -4.717910 | -4.421836 | 1.109777  |
| C | -12.609272 | -0.688133 | 0.091867  | C | -4.717910 | 4.421836  | 1.109777  |
| C | -12.609272 | 0.688133  | 0.091867  | H | -5.417917 | -4.327169 | 1.943165  |
| H | -12.686374 | -2.943943 | -1.912285 | H | -5.417917 | 4.327169  | 1.943165  |
| H | -12.686374 | 2.943943  | -1.912285 | C | -4.069503 | -0.688135 | 0.114180  |
| C | -12.764706 | -3.642393 | -1.076429 | C | -4.069503 | 0.688135  | 0.114180  |
| C | -12.764706 | 3.642393  | -1.076429 | H | -2.234924 | -4.731537 | -1.872802 |
| C | -11.952706 | -4.441989 | 1.061912  | H | -2.234924 | 4.731537  | -1.872802 |
| C | -11.952706 | 4.441989  | 1.061912  | C | -2.925351 | -4.645308 | -1.030518 |
| H | -11.246395 | -4.362053 | 1.890813  | C | -2.925351 | 4.645308  | -1.030518 |
| H | -11.246395 | 4.362053  | 1.890813  | C | -3.722170 | -5.407772 | 1.129407  |
| C | -11.848226 | -3.535428 | -0.012034 | C | -3.722170 | 5.407772  | 1.129407  |
| C | -11.848226 | 3.535428  | -0.012034 | H | -3.646927 | -6.083479 | 1.984453  |
| C | -11.246159 | 1.136555  | -0.005931 | H | -3.646927 | 6.083479  | 1.984453  |
| C | -11.246159 | -1.136555 | -0.005931 | H | -3.212139 | -1.347942 | 0.193526  |
| C | -10.791091 | -2.472192 | -0.016819 | H | -3.212139 | 1.347942  | 0.193526  |
| C | -10.791091 | 2.472192  | -0.016819 | C | -2.821721 | -5.522984 | 0.059285  |
| N | -10.462042 | 0.000000  | -0.060579 | C | -2.821721 | 5.522984  | 0.059285  |
| H | -9.683937  | -5.131056 | -0.226769 | H | -2.044879 | -6.291260 | 0.075238  |
| H | -9.683937  | 5.131056  | -0.226769 | H | -2.044879 | 6.291260  | 0.075238  |
| H | -9.444133  | 0.000000  | -0.071925 | H | 2.044879  | -6.291260 | 0.075238  |
| C | -9.432382  | -2.875554 | -0.027725 | H | 2.044879  | 6.291260  | 0.075238  |
| C | -9.432382  | 2.875554  | -0.027725 | C | 2.821721  | -5.522984 | 0.059285  |
| C | -9.018772  | -4.277214 | -0.133434 | C | 2.821721  | 5.522984  | 0.059285  |
| C | -9.018772  | 4.277214  | -0.133434 | H | 3.212139  | 1.347942  | 0.193526  |
| N | -8.339417  | -2.041025 | 0.030416  | H | 3.212139  | -1.347942 | 0.193526  |
| N | -8.339417  | 2.041025  | 0.030416  | H | 3.646927  | -6.083479 | 1.984453  |
| C | -7.657112  | -4.276954 | -0.123939 | H | 3.646927  | 6.083479  | 1.984453  |
| C | -7.657112  | 4.276954  | -0.123939 | C | 3.722170  | -5.407772 | 1.129407  |
| C | -7.245578  | -2.875124 | -0.015566 | C | 3.722170  | 5.407772  | 1.129407  |
| C | -7.245578  | 2.875124  | -0.015566 | C | 2.925351  | -4.645308 | -1.030518 |
| H | -7.234471  | 0.000000  | -0.048785 | C | 2.925351  | 4.645308  | -1.030518 |
|   |            |           |           | H | 2.234924  | -4.731537 | -1.872802 |
|   |            |           |           | H | 2.234924  | 4.731537  | -1.872802 |
|   |            |           |           | C | 4.069503  | -0.688135 | 0.114180  |

|   |           |           |           |                                  |           |           |           |
|---|-----------|-----------|-----------|----------------------------------|-----------|-----------|-----------|
| C | 4.069503  | 0.688135  | 0.114180  | H                                | 13.017334 | -6.119126 | 1.915801  |
| H | 5.417917  | -4.327169 | 1.943165  | H                                | 13.017334 | 6.119126  | 1.915801  |
| H | 5.417917  | 4.327169  | 1.943165  | C                                | 12.947725 | -5.428541 | 1.071674  |
| C | 4.717910  | -4.421836 | 1.109777  | C                                | 12.947725 | 5.428541  | 1.071674  |
| C | 4.717910  | 4.421836  | 1.109777  | C                                | 13.759877 | -4.629054 | -1.069030 |
| C | 3.920522  | -3.658534 | -1.047367 | C                                | 13.759877 | 4.629054  | -1.069030 |
| C | 3.920522  | 3.658534  | -1.047367 | H                                | 14.458660 | -4.700141 | -1.906099 |
| H | 4.003367  | -2.972578 | -1.892724 | H                                | 14.458660 | 4.700141  | -1.906099 |
| H | 4.003367  | 2.972578  | -1.892724 | H                                | 13.467074 | -1.347669 | 0.173646  |
| C | 4.829672  | -3.534150 | 0.021180  | H                                | 13.467074 | 1.347669  | 0.173646  |
| C | 4.829672  | 3.534150  | 0.021180  | C                                | 13.855608 | -5.525492 | 0.006242  |
| C | 5.432601  | 1.136302  | 0.017972  | C                                | 13.855608 | 5.525492  | 0.006242  |
| C | 5.432601  | -1.136302 | 0.017972  | H                                | 14.632016 | -6.294225 | 0.013682  |
| C | 5.887630  | -2.471290 | 0.006142  | H                                | 14.632016 | 6.294225  | 0.013682  |
| C | 5.887630  | 2.471290  | 0.006142  |                                  |           |           |           |
| N | 6.216737  | 0.000000  | -0.035577 | <u>S2- Sandwich 2H-TPP Dimer</u> |           |           |           |
| H | 6.990332  | -5.130155 | -0.207176 | E= -1045.07165541 eV             |           |           |           |
| H | 6.990332  | 5.130155  | -0.207176 | C                                | -3.038613 | 2.742607  | 2.470483  |
| H | 7.234471  | 0.000000  | -0.048785 | C                                | -3.454285 | 2.946468  | 1.136601  |
| C | 7.245578  | -2.875124 | -0.015566 | C                                | -1.755541 | 2.275154  | 2.858180  |
| C | 7.245578  | 2.875124  | -0.015566 | C                                | -4.680716 | 3.547237  | 0.688350  |
| C | 7.657112  | -4.276954 | -0.123939 | C                                | -4.680716 | 3.547237  | -0.688350 |
| C | 7.657112  | 4.276954  | -0.123939 | C                                | -3.454285 | 2.946468  | -1.136601 |
| N | 8.339417  | -2.041025 | 0.030416  | C                                | -1.408678 | 1.930655  | 4.238644  |
| N | 8.339417  | 2.041025  | 0.030416  | C                                | -0.078398 | 1.640462  | 4.236598  |
| C | 9.018772  | -4.277214 | -0.133434 | C                                | 0.376962  | 1.793599  | 2.852954  |
| C | 9.018772  | 4.277214  | -0.133434 | N                                | -2.744497 | 2.610311  | 0.000000  |
| C | 9.432382  | -2.875554 | -0.027725 | H                                | -1.788008 | 2.258651  | 0.000000  |
| C | 9.432382  | 2.875554  | -0.027725 | H                                | -5.444064 | 3.949786  | 1.345137  |
| H | 9.444133  | 0.000000  | -0.071925 | H                                | -5.444064 | 3.949786  | -1.345137 |
| H | 9.683937  | -5.131056 | -0.226769 | N                                | -0.669077 | 2.131529  | 2.025456  |
| H | 9.683937  | 5.131056  | -0.226769 | H                                | -2.102342 | 1.874004  | 5.072249  |
| N | 10.462042 | 0.000000  | -0.060579 | H                                | 0.534698  | 1.304006  | 5.066791  |
| C | 10.791091 | -2.472192 | -0.016819 | C                                | -3.038613 | 2.742607  | -2.470483 |
| C | 10.791091 | 2.472192  | -0.016819 | C                                | -1.755541 | 2.275154  | -2.858180 |
| C | 11.246159 | -1.136555 | -0.005931 | C                                | -1.408678 | 1.930655  | -4.238644 |
| C | 11.246159 | 1.136555  | -0.005931 | C                                | -0.078398 | 1.640462  | -4.236598 |
| C | 11.848226 | -3.535428 | -0.012034 | C                                | 0.376962  | 1.793599  | -2.852954 |
| C | 11.848226 | 3.535428  | -0.012034 | N                                | -0.669077 | 2.131529  | -2.025456 |
| H | 11.246395 | -4.362053 | 1.890813  | H                                | -2.102342 | 1.874004  | -5.072249 |
| H | 11.246395 | 4.362053  | 1.890813  | H                                | 0.534698  | 1.304006  | -5.066791 |
| C | 11.952706 | -4.441989 | 1.061912  | C                                | 1.736363  | 1.648687  | 2.470138  |
| C | 11.952706 | 4.441989  | 1.061912  | C                                | 3.564553  | 1.554078  | 0.688244  |
| C | 12.764706 | -3.642393 | -1.076429 | C                                | 3.564553  | 1.554078  | -0.688244 |
| C | 12.764706 | 3.642393  | -1.076429 | C                                | 2.199121  | 1.587706  | -1.137443 |
| H | 12.686374 | -2.943943 | -1.912285 | N                                | 1.413468  | 1.589976  | 0.000000  |
| H | 12.686374 | 2.943943  | -1.912285 | H                                | 4.427035  | 1.556618  | -1.345752 |
| C | 12.609272 | -0.688133 | 0.091867  | C                                | 1.736363  | 1.648687  | -2.470138 |
| C | 12.609272 | 0.688133  | 0.091867  | C                                | 2.199121  | 1.587706  | 1.137443  |

|   |           |           |           |   |           |           |           |
|---|-----------|-----------|-----------|---|-----------|-----------|-----------|
| H | 4.427035  | 1.556618  | 1.345752  | C | -3.564553 | -1.554078 | 0.688244  |
| H | 0.404131  | 1.729419  | 0.000000  | C | -3.564553 | -1.554078 | -0.688244 |
| C | 2.763464  | 1.650481  | 3.559518  | C | -2.199121 | -1.587706 | -1.137443 |
| C | 2.800249  | 2.722829  | 4.477910  | C | 0.078398  | -1.640462 | 4.236598  |
| C | 3.707615  | 0.614939  | 3.702444  | C | 1.408678  | -1.930655 | 4.238644  |
| C | 3.747391  | 2.755301  | 5.509187  | C | 1.755541  | -2.275154 | 2.858180  |
| C | 4.652626  | 0.643506  | 4.736032  | N | -1.413468 | -1.589976 | 0.000000  |
| C | 4.677560  | 1.713133  | 5.643185  | H | -0.404131 | -1.729419 | 0.000000  |
| H | 2.076016  | 3.533050  | 4.371231  | H | -4.427035 | -1.556618 | 1.345752  |
| H | 3.675845  | -0.224072 | 3.009162  | H | -4.427035 | -1.556618 | -1.345752 |
| H | 3.760503  | 3.597021  | 6.205896  | N | 0.669077  | -2.131529 | 2.025456  |
| H | 5.355845  | -0.183454 | 4.843673  | H | -0.534698 | -1.304006 | 5.066791  |
| H | 5.413832  | 1.731833  | 6.450847  | H | 2.102342  | -1.874004 | 5.072249  |
| C | 2.763464  | 1.650481  | -3.559518 | C | -1.736363 | -1.648687 | -2.470138 |
| C | 2.800249  | 2.722829  | -4.477910 | C | -0.376962 | -1.793599 | -2.852954 |
| C | 3.707615  | 0.614939  | -3.702444 | C | 0.078398  | -1.640462 | -4.236598 |
| C | 3.747391  | 2.755301  | -5.509187 | C | 1.408678  | -1.930655 | -4.238644 |
| C | 4.652626  | 0.643506  | -4.736032 | C | 1.755541  | -2.275154 | -2.858180 |
| C | 4.677560  | 1.713133  | -5.643185 | N | 0.669077  | -2.131529 | -2.025456 |
| H | 2.076016  | 3.533050  | -4.371231 | H | -0.534698 | -1.304006 | -5.066791 |
| H | 3.675845  | -0.224072 | -3.009162 | H | 2.102342  | -1.874004 | -5.072249 |
| H | 3.760503  | 3.597021  | -6.205896 | C | 3.038613  | -2.742607 | 2.470483  |
| H | 5.355845  | -0.183454 | -4.843673 | C | 4.680716  | -3.547237 | 0.688350  |
| H | 5.413832  | 1.731833  | -6.450847 | C | 4.680716  | -3.547237 | -0.688350 |
| C | -4.023894 | 3.090569  | 3.541163  | C | 3.454285  | -2.946468 | -1.136601 |
| C | -3.677966 | 3.997679  | 4.565595  | N | 2.744497  | -2.610311 | 0.000000  |
| C | -5.322581 | 2.541491  | 3.549994  | H | 5.444064  | -3.949786 | -1.345137 |
| C | -4.595642 | 4.335700  | 5.567857  | C | 3.038613  | -2.742607 | -2.470483 |
| C | -6.243284 | 2.879216  | 4.549526  | C | 3.454285  | -2.946468 | 1.136601  |
| C | -5.883016 | 3.776958  | 5.565822  | H | 5.444064  | -3.949786 | 1.345137  |
| H | -2.681423 | 4.443954  | 4.560140  | H | 1.788008  | -2.258651 | 0.000000  |
| H | -5.600958 | 1.834475  | 2.767149  | C | 4.023894  | -3.090569 | 3.541163  |
| H | -4.306953 | 5.045377  | 6.346558  | C | 5.322581  | -2.541491 | 3.549994  |
| H | -7.240827 | 2.433855  | 4.539081  | C | 3.677966  | -3.997679 | 4.565595  |
| H | -6.599639 | 4.042275  | 6.346667  | C | 6.243284  | -2.879216 | 4.549526  |
| C | -4.023894 | 3.090569  | -3.541163 | C | 4.595642  | -4.335700 | 5.567857  |
| C | -3.677966 | 3.997679  | -4.565595 | C | 5.883016  | -3.776958 | 5.565822  |
| C | -5.322581 | 2.541491  | -3.549994 | H | 5.600958  | -1.834475 | 2.767149  |
| C | -4.595642 | 4.335700  | -5.567857 | H | 2.681423  | -4.443954 | 4.560140  |
| C | -6.243284 | 2.879216  | -4.549526 | H | 7.240827  | -2.433855 | 4.539081  |
| C | -5.883016 | 3.776958  | -5.565822 | H | 4.306953  | -5.045377 | 6.346558  |
| H | -2.681423 | 4.443954  | -4.560140 | H | 6.599639  | -4.042275 | 6.346667  |
| H | -5.600958 | 1.834475  | -2.767149 | C | 4.023894  | -3.090569 | -3.541163 |
| H | -4.306953 | 5.045377  | -6.346558 | C | 5.322581  | -2.541491 | -3.549994 |
| H | -7.240827 | 2.433855  | -4.539081 | C | 3.677966  | -3.997679 | -4.565595 |
| H | -6.599639 | 4.042275  | -6.346667 | C | 6.243284  | -2.879216 | -4.549526 |
| C | -1.736363 | -1.648687 | 2.470138  | C | 4.595642  | -4.335700 | -5.567857 |
| C | -2.199121 | -1.587706 | 1.137443  | C | 5.883016  | -3.776958 | -5.565822 |
| C | -0.376962 | -1.793599 | 2.852954  | H | 5.600958  | -1.834475 | -2.767149 |

|   |           |           |           |    |           |           |           |
|---|-----------|-----------|-----------|----|-----------|-----------|-----------|
| H | 2.681423  | -4.443954 | -4.560140 | Ag | 0.834050  | 1.444617  | -1.293216 |
| H | 7.240827  | -2.433855 | -4.539081 | Ag | -1.668102 | -2.889237 | -1.293214 |
| H | 4.306953  | -5.045377 | -6.346558 | Ag | -1.668102 | 2.889237  | -1.293214 |
| H | 6.599639  | -4.042275 | -6.346667 | Ag | 3.336203  | 0.000000  | -1.293214 |
| C | -2.763464 | -1.650481 | 3.559518  | Ag | -1.668100 | -5.778479 | -1.293212 |
| C | -3.707615 | -0.614939 | 3.702444  | Ag | -1.668100 | 5.778479  | -1.293212 |
| C | -2.800249 | -2.722829 | 4.477910  | Ag | -4.170260 | -4.333857 | -1.293212 |
| C | -4.652626 | -0.643506 | 4.736032  | Ag | -4.170260 | 4.333857  | -1.293212 |
| C | -3.747391 | -2.755301 | 5.509187  | Ag | 5.838360  | 1.444622  | -1.293212 |
| C | -4.677560 | -1.713133 | 5.643185  | Ag | 5.838360  | -1.444622 | -1.293212 |
| H | -3.675845 | 0.224072  | 3.009162  | Ag | -7.787319 | 4.597414  | 0.982917  |
| H | -2.076016 | -3.533050 | 4.371231  | Ag | -7.787319 | -4.597414 | 0.982917  |
| H | -5.355845 | 0.183454  | 4.843673  | Ag | 7.875137  | -4.445310 | 0.982917  |
| H | -3.760503 | -3.597021 | 6.205896  | Ag | 7.875137  | 4.445310  | 0.982917  |
| H | -5.413832 | -1.731833 | 6.450847  | Ag | -0.087817 | -9.042723 | 0.982917  |
| C | -2.763464 | -1.650481 | -3.559518 | Ag | -0.087817 | 9.042723  | 0.982917  |
| C | -3.707615 | -0.614939 | -3.702444 | Ag | -7.954438 | 1.518828  | 1.202254  |
| C | -2.800249 | -2.722829 | -4.477910 | Ag | -7.954438 | -1.518828 | 1.202254  |
| C | -4.652626 | -0.643506 | -4.736032 | Ag | 5.292563  | -6.129331 | 1.202254  |
| C | -3.747391 | -2.755301 | -5.509187 | Ag | 5.292563  | 6.129331  | 1.202254  |
| C | -4.677560 | -1.713133 | -5.643185 | Ag | 2.661875  | -7.648160 | 1.202254  |
| H | -3.675845 | 0.224072  | -3.009162 | Ag | 2.661875  | 7.648160  | 1.202254  |
| H | -2.076016 | -3.533050 | -4.371231 | Ag | -5.248020 | 3.062867  | 1.676706  |
| H | -5.355845 | 0.183454  | -4.843673 | Ag | -5.248020 | -3.062867 | 1.676706  |
| H | -3.760503 | -3.597021 | -6.205896 | Ag | 5.276530  | -3.013485 | 1.676706  |
| H | -5.413832 | -1.731833 | -6.450847 | Ag | 5.276530  | 3.013485  | 1.676706  |

S3- Ag(111) 64-Benzene

E=-183.74769746 eV

Symmetry: C<sub>3v</sub>

|    |           |           |           |    |           |           |          |
|----|-----------|-----------|-----------|----|-----------|-----------|----------|
| Ag | -6.672409 | 2.889236  | -1.293224 | Ag | -0.028511 | -6.076352 | 1.676706 |
| Ag | -6.672409 | -2.889236 | -1.293224 | Ag | -0.028511 | 6.076352  | 1.676706 |
| Ag | 5.838356  | -4.333857 | -1.293224 | Ag | -5.295288 | 0.000000  | 1.665041 |
| Ag | 5.838356  | 4.333857  | -1.293224 | Ag | 2.647644  | -4.585854 | 1.665041 |
| Ag | 0.834052  | -7.223094 | -1.293224 | Ag | 2.647644  | 4.585854  | 1.665041 |
| Ag | 0.834052  | 7.223094  | -1.293224 | Ag | -2.699858 | 1.561404  | 1.468911 |
| Ag | -6.672411 | 0.000000  | -1.293222 | Ag | -2.699858 | -1.561404 | 1.468911 |
| Ag | 3.336206  | -5.778478 | -1.293222 | Ag | 2.702144  | -1.557444 | 1.468911 |
| Ag | 3.336206  | 5.778478  | -1.293222 | Ag | 2.702144  | 1.557444  | 1.468911 |
| Ag | -4.170257 | 1.444622  | -1.293220 | Ag | -0.002286 | -3.118847 | 1.468911 |
| Ag | -4.170257 | -1.444622 | -1.293220 | Ag | -0.002286 | 3.118847  | 1.468911 |
| Ag | 3.336207  | -2.889238 | -1.293220 | Ag | -2.651321 | -4.592222 | 1.669296 |
| Ag | 3.336207  | 2.889238  | -1.293220 | Ag | -2.651321 | 4.592222  | 1.669296 |
| Ag | 0.834049  | -4.333859 | -1.293220 | Ag | 5.302642  | 0.000000  | 1.669296 |
| Ag | 0.834049  | 4.333859  | -1.293220 | Ag | 0.000000  | 0.000000  | 1.312384 |
| Ag | -1.668100 | 0.000000  | -1.293216 | Ag | -2.721867 | -7.678530 | 0.691063 |
| Ag | 0.834050  | -1.444617 | -1.293216 | Ag | -2.721867 | 7.678530  | 0.691063 |
|    |           |           |           | Ag | -5.288869 | -6.196471 | 0.691063 |
|    |           |           |           | Ag | -5.288869 | 6.196471  | 0.691063 |
|    |           |           |           | Ag | 8.010735  | 1.482059  | 0.691063 |
|    |           |           |           | Ag | 8.010735  | -1.482059 | 0.691063 |
|    |           |           |           | C  | -1.217347 | 0.702723  | 4.528152 |
|    |           |           |           | C  | -1.217347 | -0.702723 | 4.528152 |

|                                              |            |            |           |    |            |            |           |
|----------------------------------------------|------------|------------|-----------|----|------------|------------|-----------|
| C                                            | 0.000098   | -1.405615  | 4.528152  | Ag | 11.676697  | -2.889229  | -1.641269 |
| C                                            | 1.217250   | -0.702892  | 4.528152  | Ag | -8.340494  | -8.667702  | -1.641269 |
| C                                            | 1.217250   | 0.702892   | 4.528152  | Ag | 11.676697  | 2.889229   | -1.641269 |
| C                                            | 0.000098   | 1.405615   | 4.528152  | Ag | -3.336206  | 5.778479   | -1.641266 |
| H                                            | -2.163502  | 1.249690   | 4.528808  | Ag | -3.336206  | -5.778479  | -1.641266 |
| H                                            | -2.163502  | -1.249690  | 4.528808  | Ag | 6.672412   | 0.000000   | -1.641266 |
| H                                            | -0.000512  | -2.498492  | 4.528808  | Ag | -5.838351  | 10.112321  | -1.641265 |
| H                                            | 2.164014   | -1.248802  | 4.528808  | Ag | -5.838351  | -10.112321 | -1.641265 |
| H                                            | 2.164014   | 1.248802   | 4.528808  | Ag | 11.676702  | 0.000000   | -1.641265 |
| H                                            | -0.000512  | 2.498492   | 4.528808  | Ag | -3.336201  | 0.000000   | -1.641263 |
| <u>S4- Ag(111) 166-Benzene</u>               |            |            |           | Ag | 1.668100   | 2.889235   | -1.641263 |
| E=-372.89129933 eV Symmetry: C <sub>3v</sub> |            |            |           | Ag | 1.668100   | -2.889235  | -1.641263 |
| Ag                                           | -0.834052  | 1.444620   | -1.641278 | Ag | -5.838359  | -1.444619  | -1.641259 |
| Ag                                           | -0.834052  | -1.444620  | -1.641278 | Ag | 4.170256   | 4.333858   | -1.641259 |
| Ag                                           | 1.668103   | 0.000000   | -1.641278 | Ag | -5.838359  | 1.444619   | -1.641259 |
| Ag                                           | -0.834055  | 10.112322  | -1.641277 | Ag | 1.668103   | 5.778477   | -1.641259 |
| Ag                                           | -8.340500  | 5.778474   | -1.641277 | Ag | 4.170256   | -4.333858  | -1.641259 |
| Ag                                           | -0.834055  | -10.112322 | -1.641277 | Ag | 1.668103   | -5.778477  | -1.641259 |
| Ag                                           | 9.174555   | -4.333848  | -1.641277 | Ag | -8.340507  | -2.889239  | -1.641254 |
| Ag                                           | -8.340500  | -5.778474  | -1.641277 | Ag | 6.672408   | 5.778472   | -1.641254 |
| Ag                                           | 9.174555   | 4.333848   | -1.641277 | Ag | -8.340507  | 2.889239   | -1.641254 |
| Ag                                           | -0.834054  | 4.333856   | -1.641274 | Ag | 1.668099   | 8.667711   | -1.641254 |
| Ag                                           | -3.336202  | 2.889240   | -1.641274 | Ag | 6.672408   | -5.778472  | -1.641254 |
| Ag                                           | -0.834054  | -4.333856  | -1.641274 | Ag | 1.668099   | -8.667711  | -1.641254 |
| Ag                                           | 4.170256   | -1.444616  | -1.641274 | Ag | -8.340507  | 0.000000   | -1.641251 |
| Ag                                           | -3.336202  | -2.889240  | -1.641274 | Ag | 4.170254   | 7.223091   | -1.641251 |
| Ag                                           | 4.170256   | 1.444616   | -1.641274 | Ag | 4.170254   | -7.223091  | -1.641251 |
| Ag                                           | -0.834054  | 13.001559  | -1.641274 | Ag | -10.842655 | -4.333848  | -1.641250 |
| Ag                                           | -10.842654 | 7.223092   | -1.641274 | Ag | 9.174550   | 7.223091   | -1.641250 |
| Ag                                           | -0.834054  | -13.001559 | -1.641274 | Ag | -10.842655 | 4.333848   | -1.641250 |
| Ag                                           | 11.676708  | -5.778467  | -1.641274 | Ag | 1.668105   | 11.556939  | -1.641250 |
| Ag                                           | -10.842654 | -7.223092  | -1.641274 | Ag | 9.174550   | -7.223091  | -1.641250 |
| Ag                                           | 11.676708  | 5.778467   | -1.641274 | Ag | 1.668105   | -11.556939 | -1.641250 |
| Ag                                           | -3.336213  | 8.667703   | -1.641273 | Ag | -10.842656 | -1.444620  | -1.641246 |
| Ag                                           | -5.838345  | 7.223097   | -1.641273 | Ag | 6.672406   | 8.667705   | -1.641246 |
| Ag                                           | -3.336213  | -8.667703  | -1.641273 | Ag | -10.842656 | 1.444620   | -1.641246 |
| Ag                                           | 9.174558   | -1.444606  | -1.641273 | Ag | 4.170250   | 10.112325  | -1.641246 |
| Ag                                           | -5.838345  | -7.223097  | -1.641273 | Ag | 6.672406   | -8.667705  | -1.641246 |
| Ag                                           | 9.174558   | 1.444606   | -1.641273 | Ag | 4.170250   | -10.112325 | -1.641246 |
| Ag                                           | -0.834054  | 7.223084   | -1.641271 | Ag | -13.132014 | -4.667425  | 0.240009  |
| Ag                                           | -5.838348  | 4.333854   | -1.641271 | Ag | 10.608116  | 9.038945   | 0.240009  |
| Ag                                           | -0.834054  | -7.223084  | -1.641271 | Ag | -13.132014 | 4.667425   | 0.240009  |
| Ag                                           | 6.672402   | -2.889230  | -1.641271 | Ag | 2.523898   | 13.706371  | 0.240009  |
| Ag                                           | -5.838348  | -4.333854  | -1.641271 | Ag | 10.608116  | -9.038945  | 0.240009  |
| Ag                                           | 6.672402   | 2.889230   | -1.641271 | Ag | 2.523898   | -13.706371 | 0.240009  |
| Ag                                           | -3.336203  | 11.556930  | -1.641269 | Ag | -13.079773 | -1.593239  | 0.297832  |
| Ag                                           | -8.340494  | 8.667702   | -1.641269 | Ag | 7.919671   | 10.530796  | 0.297832  |
| Ag                                           | -3.336203  | -11.556930 | -1.641269 | Ag | -13.079773 | 1.593239   | 0.297832  |
|                                              |            |            |           | Ag | 5.160101   | 12.124035  | 0.297832  |

|    |            |            |          |    |            |            |          |
|----|------------|------------|----------|----|------------|------------|----------|
| Ag | 7.919671   | -10.530796 | 0.297832 | Ag | -2.650993  | -4.591655  | 1.212813 |
| Ag | 5.160101   | -12.124035 | 0.297832 | Ag | 5.301987   | 0.000000   | 1.212813 |
| Ag | -0.094487  | 15.172654  | 0.487307 | Ag | -0.044086  | 9.174546   | 1.224618 |
| Ag | -13.092660 | 7.668155   | 0.487307 | Ag | -7.923347  | 4.625453   | 1.224618 |
| Ag | -0.094487  | -15.172654 | 0.487307 | Ag | -0.044086  | -9.174546  | 1.224618 |
| Ag | 13.187147  | -7.504499  | 0.487307 | Ag | 7.967433   | -4.549093  | 1.224618 |
| Ag | -13.092660 | -7.668155  | 0.487307 | Ag | -7.923347  | -4.625453  | 1.224618 |
| Ag | 13.187147  | 7.504499   | 0.487307 | Ag | 7.967433   | 4.549093   | 1.224618 |
| Ag | -5.417787  | 12.383932  | 0.676159 | Ag | -7.889211  | -1.551838  | 1.235125 |
| Ag | -8.015906  | 10.883907  | 0.676159 | Ag | 5.288537   | 6.056339   | 1.235125 |
| Ag | -5.417787  | -12.383932 | 0.676159 | Ag | -7.889211  | 1.551838   | 1.235125 |
| Ag | 13.433693  | -1.500025  | 0.676159 | Ag | 2.600675   | 7.608176   | 1.235125 |
| Ag | -8.015906  | -10.883907 | 0.676159 | Ag | 5.288537   | -6.056339  | 1.235125 |
| Ag | 13.433693  | 1.500025   | 0.676159 | Ag | 2.600675   | -7.608176  | 1.235125 |
| Ag | -2.810427  | 13.837082  | 0.730460 | Ag | -10.508123 | -3.094728  | 1.242239 |
| Ag | -10.578051 | 9.352442   | 0.730460 | Ag | 7.934175   | 7.552937   | 1.242239 |
| Ag | -2.810427  | -13.837082 | 0.730460 | Ag | -10.508123 | 3.094728   | 1.242239 |
| Ag | 13.388478  | -4.484640  | 0.730460 | Ag | 2.573948   | 10.647666  | 1.242239 |
| Ag | -10.578051 | -9.352442  | 0.730460 | Ag | 7.934175   | -7.552937  | 1.242239 |
| Ag | 13.388478  | 4.484640   | 0.730460 | Ag | 2.573948   | -10.647666 | 1.242239 |
| Ag | 0.000000   | 0.000000   | 1.023508 | Ag | -2.692265  | 10.736687  | 1.239069 |
| Ag | -0.005871  | 3.057964   | 1.132958 | Ag | -7.952111  | 7.699913   | 1.239069 |
| Ag | -2.645339  | 1.534066   | 1.132958 | Ag | -2.692265  | -10.736687 | 1.239069 |
| Ag | -0.005871  | -3.057964  | 1.132958 | Ag | 10.644376  | -3.036774  | 1.239069 |
| Ag | 2.651209   | -1.523898  | 1.132958 | Ag | -7.952111  | -7.699913  | 1.239069 |
| Ag | -2.645339  | -1.534066  | 1.132958 | Ag | 10.644376  | 3.036774   | 1.239069 |
| Ag | 2.651209   | 1.523898   | 1.132958 | Ag | -0.070019  | 12.182003  | 1.297401 |
| Ag | -5.257672  | 0.000000   | 1.198300 | Ag | -10.514915 | 6.151640   | 1.297401 |
| Ag | 2.628836   | 4.553278   | 1.198300 | Ag | -0.070019  | -12.182003 | 1.297401 |
| Ag | 2.628836   | -4.553278  | 1.198300 | Ag | 10.584933  | -6.030363  | 1.297401 |
| Ag | -2.672926  | 7.669849   | 1.194878 | Ag | -10.514915 | -6.151640  | 1.297401 |
| Ag | -5.305821  | 6.149747   | 1.194878 | Ag | 10.584933  | 6.030363   | 1.297401 |
| Ag | -2.672926  | -7.669849  | 1.194878 | C  | 0.000033   | 1.404795   | 4.281678 |
| Ag | 7.978747   | -1.520102  | 1.194878 | C  | -1.216604  | 0.702369   | 4.281678 |
| Ag | -5.305821  | -6.149747  | 1.194878 | C  | -1.216604  | -0.702369  | 4.281678 |
| Ag | 7.978747   | 1.520102   | 1.194878 | C  | 0.000033   | -1.404795  | 4.281678 |
| Ag | -0.036086  | 6.128158   | 1.203431 | C  | 1.216572   | -0.702426  | 4.281678 |
| Ag | -5.289098  | 3.095331   | 1.203431 | C  | 1.216572   | 0.702426   | 4.281678 |
| Ag | -0.036086  | -6.128158  | 1.203431 | H  | 0.000240   | 2.497448   | 4.272639 |
| Ag | 5.325184   | -3.032828  | 1.203431 | H  | -2.162974  | 1.248516   | 4.272639 |
| Ag | -5.289098  | -3.095331  | 1.203431 | H  | -2.162974  | -1.248516  | 4.272639 |
| Ag | 5.325184   | 3.032828   | 1.203431 | H  | 0.000240   | -2.497448  | 4.272639 |
| Ag | -10.482963 | 0.000000   | 1.198702 | H  | 2.162734   | -1.248932  | 4.272639 |
| Ag | 5.241482   | 9.078512   | 1.198702 | H  | 2.162734   | 1.248932   | 4.272639 |
| Ag | 5.241482   | -9.078512  | 1.198702 |    |            |            |          |
| Ag | -5.312810  | 9.202056   | 1.192267 |    |            |            |          |
| Ag | -5.312810  | -9.202056  | 1.192267 |    |            |            |          |
| Ag | 10.625619  | 0.000000   | 1.192267 |    |            |            |          |
| Ag | -2.650993  | 4.591655   | 1.212813 |    |            |            |          |

S5- Cu(111) 64-Benzene

E= -232.05207362 eV Symmetry: C<sub>3v</sub>

|    |           |           |          |
|----|-----------|-----------|----------|
| CU | -5.158257 | -3.828868 | 2.032641 |
| CU | -5.158257 | 3.828868  | 2.032641 |

|    |           |           |           |
|----|-----------|-----------|-----------|
| CU | -0.736769 | 6.381616  | 2.032641  |
| CU | -0.736769 | -6.381616 | 2.032641  |
| CU | 5.895026  | -2.552748 | 2.032641  |
| CU | 5.895026  | 2.552748  | 2.032641  |
| CU | -0.736889 | -1.276329 | 2.032520  |
| CU | -0.736889 | 1.276329  | 2.032520  |
| CU | 1.473778  | 0.000000  | 2.032520  |
| CU | -2.947539 | 5.105288  | 2.032512  |
| CU | -2.947539 | -5.105288 | 2.032512  |
| CU | 5.895078  | 0.000000  | 2.032512  |
| CU | -2.947628 | 0.000000  | 2.032371  |
| CU | 1.473814  | 2.552721  | 2.032371  |
| CU | 1.473814  | -2.552721 | 2.032371  |
| CU | -2.947628 | 2.552669  | 2.032312  |
| CU | -2.947628 | -2.552669 | 2.032312  |
| CU | -0.736862 | 3.829055  | 2.032312  |
| CU | 3.684490  | 1.276386  | 2.032312  |
| CU | 3.684490  | -1.276386 | 2.032312  |
| CU | -0.736862 | -3.829055 | 2.032312  |
| CU | -5.158207 | -1.276329 | 2.032302  |
| CU | -5.158207 | 1.276329  | 2.032302  |
| CU | 1.473770  | 5.105303  | 2.032302  |
| CU | 3.684437  | 3.828974  | 2.032302  |
| CU | 1.473770  | -5.105303 | 2.032302  |
| CU | 3.684437  | -3.828974 | 2.032302  |
| CU | 4.438931  | -5.160010 | 0.025258  |
| CU | 2.249234  | -6.424232 | 0.025258  |
| CU | -6.688165 | -1.264222 | 0.025258  |
| CU | -6.688165 | 1.264222  | 0.025258  |
| CU | 2.249234  | 6.424232  | 0.025258  |
| CU | 4.438931  | 5.160010  | 0.025258  |
| CU | 6.603256  | -3.830932 | -0.073919 |
| CU | 0.016057  | -7.634053 | -0.073919 |
| CU | -6.619312 | -3.803121 | -0.073919 |
| CU | -6.619312 | 3.803121  | -0.073919 |
| CU | 0.016057  | 7.634053  | -0.073919 |
| CU | 6.603256  | 3.830932  | -0.073919 |
| CU | 6.639379  | 1.270970  | -0.116967 |
| CU | 6.639379  | -1.270970 | -0.116967 |
| CU | -2.218997 | -6.385356 | -0.116967 |
| CU | -4.420382 | -5.114386 | -0.116967 |
| CU | -4.420382 | 5.114386  | -0.116967 |
| CU | -2.218997 | 6.385356  | -0.116967 |
| CU | 0.000000  | 0.000000  | -0.079687 |
| CU | 2.227987  | -1.291122 | -0.179093 |
| CU | 0.004151  | -2.575054 | -0.179093 |
| CU | -2.232138 | -1.283932 | -0.179093 |
| CU | -2.232138 | 1.283932  | -0.179093 |
| CU | 0.004151  | 2.575054  | -0.179093 |

|    |           |           |           |
|----|-----------|-----------|-----------|
| CU | 2.227987  | 1.291122  | -0.179093 |
| CU | 2.221518  | -3.847783 | -0.224244 |
| CU | -4.443037 | 0.000000  | -0.224244 |
| CU | 2.221518  | 3.847783  | -0.224244 |
| CU | 0.015427  | -5.110435 | -0.228404 |
| CU | -4.433480 | -2.541858 | -0.228404 |
| CU | -4.433480 | 2.541858  | -0.228404 |
| CU | 0.015427  | 5.110435  | -0.228404 |
| CU | 4.418053  | 2.568577  | -0.228404 |
| CU | 4.418053  | -2.568577 | -0.228404 |
| CU | -2.210259 | -3.828281 | -0.251616 |
| CU | -2.210259 | 3.828281  | -0.251616 |
| CU | 4.420518  | 0.000000  | -0.251616 |
| C  | -1.219381 | 0.704528  | -3.012385 |
| C  | -1.219381 | -0.704528 | -3.012385 |
| C  | -0.000449 | -1.408279 | -3.012385 |
| C  | 1.219830  | -0.703750 | -3.012385 |
| C  | 1.219830  | 0.703750  | -3.012385 |
| C  | -0.000449 | 1.408279  | -3.012385 |
| H  | -2.166704 | 1.250391  | -2.989851 |
| H  | -2.166704 | -1.250391 | -2.989851 |
| H  | 0.000482  | -2.501616 | -2.989851 |
| H  | 2.166222  | -1.251226 | -2.989851 |
| H  | 2.166222  | 1.251226  | -2.989851 |
| H  | 0.000482  | 2.501616  | -2.989851 |

#### S6-Cu(111)-TPP

E=-957.51619907 eV Symmetry: C<sub>s</sub>

|    |           |           |            |
|----|-----------|-----------|------------|
| Cu | 8.105765  | -1.142575 | -6.381640  |
| Cu | 8.105765  | -1.142575 | 6.381640   |
| Cu | 1.473780  | -1.142575 | -10.210618 |
| Cu | 1.473780  | -1.142575 | 10.210618  |
| Cu | -9.579545 | -1.142575 | 3.828978   |
| Cu | -9.579545 | -1.142575 | -3.828978  |
| Cu | 5.895106  | -1.142573 | -7.657965  |
| Cu | 5.895106  | -1.142573 | 7.657965   |
| Cu | 3.684439  | -1.142573 | -8.934294  |
| Cu | 3.684439  | -1.142573 | 8.934294   |
| Cu | -9.579545 | -1.142573 | 1.276329   |
| Cu | -9.579545 | -1.142573 | -1.276329  |
| Cu | 5.895105  | -1.142571 | -5.105304  |
| Cu | 5.895105  | -1.142571 | 5.105304   |
| Cu | 1.473770  | -1.142571 | -7.657963  |
| Cu | 1.473770  | -1.142571 | 7.657963   |
| Cu | -7.368876 | -1.142571 | 2.552659   |
| Cu | -7.368876 | -1.142571 | -2.552659  |
| Cu | 10.316433 | -1.142569 | 5.105310   |
| Cu | 10.316433 | -1.142569 | -5.105310  |
| Cu | 3.684438  | -1.142569 | -6.381633  |

|    |           |           |            |    |            |           |            |
|----|-----------|-----------|------------|----|------------|-----------|------------|
| Cu | 3.684438  | -1.142569 | 6.381633   | Cu | 1.473778   | -1.142560 | 0.000000   |
| Cu | -0.736888 | -1.142569 | -11.486948 | Cu | -0.736889  | -1.142560 | -1.276329  |
| Cu | -0.736888 | -1.142569 | 11.486948  | Cu | -0.736889  | -1.142560 | 1.276329   |
| Cu | -7.368876 | -1.142569 | 0.000000   | Cu | -2.947550  | -1.142560 | -5.105306  |
| Cu | -9.579545 | -1.142569 | -6.381638  | Cu | -2.947550  | -1.142560 | 5.105306   |
| Cu | -9.579545 | -1.142569 | 6.381638   | Cu | 8.860490   | 0.957321  | -7.663791  |
| Cu | 3.684442  | -1.142567 | -3.828982  | Cu | 8.860490   | 0.957321  | 7.663791   |
| Cu | 3.684442  | -1.142567 | 3.828982   | Cu | 2.206793   | 0.957321  | -11.505305 |
| Cu | 1.473774  | -1.142567 | -5.105311  | Cu | 2.206793   | 0.957321  | 11.505305  |
| Cu | 1.473774  | -1.142567 | 5.105311   | Cu | -11.067282 | 0.957321  | 3.841514   |
| Cu | -5.158216 | -1.142567 | 1.276329   | Cu | -11.067282 | 0.957321  | -3.841514  |
| Cu | -5.158216 | -1.142567 | -1.276329  | Cu | 6.643155   | 0.943229  | -8.937935  |
| Cu | 8.105764  | -1.142566 | 3.828979   | Cu | 6.643155   | 0.943229  | 8.937935   |
| Cu | 8.105764  | -1.142566 | -3.828979  | Cu | 4.418901   | 0.943229  | -10.222109 |
| Cu | -0.736889 | -1.142566 | -8.934287  | Cu | 4.418901   | 0.943229  | 10.222109  |
| Cu | -0.736889 | -1.142566 | 8.934287   | Cu | -11.062056 | 0.943229  | 1.284174   |
| Cu | -7.368875 | -1.142566 | -5.105308  | Cu | -11.062056 | 0.943229  | -1.284174  |
| Cu | -7.368875 | -1.142566 | 5.105308   | Cu | 6.643226   | 1.063727  | -6.378226  |
| Cu | 10.316432 | -1.142565 | 2.552650   | Cu | 6.643226   | 1.063727  | 6.378226   |
| Cu | 10.316432 | -1.142565 | -2.552650  | Cu | 2.202092   | 1.063727  | -8.942316  |
| Cu | -2.947556 | -1.142565 | -10.210617 | Cu | 2.202092   | 1.063727  | 8.942316   |
| Cu | -2.947556 | -1.142565 | 10.210617  | Cu | -8.845319  | 1.063727  | 2.564090   |
| Cu | -7.368876 | -1.142565 | -7.657967  | Cu | -8.845319  | 1.063727  | -2.564090  |
| Cu | -7.368876 | -1.142565 | 7.657967   | Cu | 11.063551  | 0.959830  | 6.377028   |
| Cu | 5.895101  | -1.142564 | -2.552657  | Cu | 11.063551  | 0.959830  | -6.377028  |
| Cu | 5.895101  | -1.142564 | 2.552657   | Cu | 4.422871   | 1.063741  | -7.660638  |
| Cu | -0.736884 | -1.142564 | -6.381636  | Cu | 4.422871   | 1.063741  | 7.660638   |
| Cu | -0.736884 | -1.142564 | 6.381636   | Cu | -0.009107  | 0.959830  | -12.769830 |
| Cu | -5.158216 | -1.142564 | -3.828978  | Cu | -0.009107  | 0.959830  | 12.769830  |
| Cu | -5.158216 | -1.142564 | 3.828978   | Cu | -8.845743  | 1.063741  | 0.000000   |
| Cu | 8.105768  | -1.142563 | -1.276328  | Cu | -11.054444 | 0.959830  | -6.392802  |
| Cu | 8.105768  | -1.142563 | 1.276328   | Cu | -11.054444 | 0.959830  | 6.392802   |
| Cu | 1.473774  | -1.142563 | -2.552651  | Cu | 4.424540   | 1.100325  | -5.101812  |
| Cu | 1.473774  | -1.142563 | 2.552651   | Cu | 4.424540   | 1.100325  | 5.101812   |
| Cu | -2.947547 | -1.142563 | 0.000000   | Cu | 2.206028   | 1.100325  | -6.382670  |
| Cu | -2.947552 | -1.142563 | -7.657965  | Cu | 2.206028   | 1.100325  | 6.382670   |
| Cu | -2.947552 | -1.142563 | 7.657965   | Cu | -6.630569  | 1.100325  | 1.280858   |
| Cu | -5.158216 | -1.142563 | -6.381637  | Cu | -6.630569  | 1.100325  | -1.280858  |
| Cu | -5.158216 | -1.142563 | 6.381637   | Cu | 8.866523   | 1.085428  | 5.105915   |
| Cu | 3.684441  | -1.142562 | -1.276321  | Cu | 8.866523   | 1.085428  | -5.105915  |
| Cu | 3.684441  | -1.142562 | 1.276321   | Cu | -0.011409  | 1.085428  | -10.231592 |
| Cu | -0.736894 | -1.142562 | -3.828980  | Cu | -0.011409  | 1.085428  | 10.231592  |
| Cu | -0.736894 | -1.142562 | 3.828980   | Cu | -8.855114  | 1.085428  | -5.125676  |
| Cu | -2.947547 | -1.142562 | -2.552659  | Cu | -8.855114  | 1.085428  | 5.125676   |
| Cu | -2.947547 | -1.142562 | 2.552659   | Cu | 11.105078  | 0.976411  | 3.825237   |
| Cu | 10.316427 | -1.142561 | 0.000000   | Cu | 11.105078  | 0.976411  | -3.825237  |
| Cu | -5.158214 | -1.142561 | -8.934288  | Cu | -2.239787  | 0.976411  | -11.529898 |
| Cu | -5.158214 | -1.142561 | 8.934288   | Cu | -2.239787  | 0.976411  | 11.529898  |
| Cu | 5.895100  | -1.142560 | 0.000000   | Cu | -8.865291  | 0.976411  | -7.704661  |



|    |           |          |            |   |           |          |           |
|----|-----------|----------|------------|---|-----------|----------|-----------|
| Cu | -8.865291 | 0.976411 | 7.704661   | H | 2.413003  | 3.428917 | -5.054629 |
| Cu | 6.648332  | 1.090726 | 3.830177   | H | 2.413003  | 3.428917 | 5.054629  |
| Cu | 6.648332  | 1.090726 | -3.830177  | H | -3.680270 | 3.527812 | -6.874598 |
| Cu | -0.007135 | 1.090726 | -7.672713  | H | -3.680270 | 3.527812 | 6.874598  |
| Cu | -0.007135 | 1.090726 | 7.672713   | H | 4.080223  | 3.547983 | -6.859862 |
| Cu | -6.641197 | 1.090726 | -3.842536  | H | 4.080223  | 3.547983 | 6.859862  |
| Cu | -6.641197 | 1.090726 | 3.842536   | H | 5.263510  | 3.498115 | 1.334079  |
| Cu | 2.209076  | 1.069521 | -3.826233  | H | 5.263510  | 3.498115 | -1.334079 |
| Cu | 2.209076  | 1.069521 | 3.826233   | H | -4.937082 | 3.505484 | -1.330024 |
| Cu | -4.418153 | 1.069521 | 0.000000   | H | -4.937082 | 3.505484 | 1.330024  |
| Cu | 8.862277  | 1.105460 | 2.561247   | C | 4.410758  | 3.693234 | -0.694118 |
| Cu | 8.862277  | 1.105460 | -2.561247  | C | 4.410758  | 3.693234 | 0.694118  |
| Cu | 4.441194  | 1.098855 | -2.560546  | C | -4.082799 | 3.707161 | -0.693617 |
| Cu | 4.441194  | 1.098855 | 2.560546   | C | -4.082799 | 3.707161 | 0.693617  |
| Cu | -0.003099 | 1.098855 | -5.126460  | C | -3.018739 | 3.870888 | -4.853508 |
| Cu | -0.003099 | 1.098855 | 5.126460   | C | -3.018739 | 3.870888 | 4.853508  |
| Cu | -2.213034 | 1.105460 | -8.955581  | C | 3.390045  | 3.872533 | -4.847142 |
| Cu | -2.213034 | 1.105460 | 8.955581   | C | 3.390045  | 3.872533 | 4.847142  |
| Cu | -4.438095 | 1.098855 | -2.565914  | C | -3.960609 | 3.914886 | -5.891039 |
| Cu | -4.438095 | 1.098855 | 2.565914   | C | -3.960609 | 3.914886 | 5.891039  |
| Cu | -6.649244 | 1.105460 | -6.394334  | C | 4.343340  | 3.934985 | -5.872117 |
| Cu | -6.649244 | 1.105460 | 6.394334   | C | 4.343340  | 3.934985 | 5.872117  |
| Cu | 11.094578 | 0.983895 | 1.281284   | C | 3.077207  | 3.996465 | 1.146630  |
| Cu | 11.094578 | 0.983895 | -1.281284  | C | 3.077207  | 3.996465 | -1.146630 |
| Cu | -4.437664 | 0.983895 | -10.248829 | C | -2.748589 | 4.004284 | -1.147257 |
| Cu | -4.437664 | 0.983895 | 10.248829  | C | -2.748589 | 4.004284 | 1.147257  |
| Cu | -6.656914 | 0.983895 | -8.967544  | N | 0.168513  | 4.113168 | -2.054745 |
| Cu | -6.656914 | 0.983895 | 8.967544   | N | 0.168513  | 4.113168 | 2.054745  |
| Cu | 6.644651  | 1.081595 | -1.271261  | N | 2.305394  | 4.111571 | 0.000000  |
| Cu | 6.644651  | 1.081595 | 1.271261   | N | -1.976669 | 4.117776 | 0.000000  |
| Cu | -2.221381 | 1.081595 | -6.390067  | C | 2.635935  | 4.264059 | -2.471391 |
| Cu | -2.221381 | 1.081595 | 6.390067   | C | 2.635935  | 4.264059 | 2.471391  |
| Cu | -4.423270 | 1.081595 | -5.118806  | C | -2.300769 | 4.271351 | -2.470363 |
| Cu | -4.423270 | 1.081595 | 5.118806   | C | -2.300769 | 4.271351 | 2.470363  |
| Cu | 8.870651  | 1.101197 | 0.000000   | H | 1.293361  | 4.231886 | 0.000000  |
| Cu | 2.218557  | 1.061629 | -1.275808  | H | -0.966019 | 4.246815 | 0.000000  |
| Cu | 2.218557  | 1.061629 | 1.275808   | C | 1.267815  | 4.487450 | -2.807675 |
| Cu | -0.004397 | 1.061629 | -2.559231  | C | -0.931175 | 4.496396 | -2.802688 |
| Cu | -0.004397 | 1.061629 | 2.559231   | C | 1.267815  | 4.487450 | 2.807675  |
| Cu | -2.214160 | 1.061629 | -1.283423  | C | -0.931175 | 4.496396 | 2.802688  |
| Cu | -2.214160 | 1.061629 | 1.283423   | C | -3.317766 | 4.364024 | -3.558318 |
| Cu | -4.435326 | 1.101197 | -7.682209  | C | -3.317766 | 4.364024 | 3.558318  |
| Cu | -4.435326 | 1.101197 | 7.682209   | C | 3.663740  | 4.370267 | -3.547697 |
| Cu | 4.430122  | 1.090351 | 0.000000   | C | 3.663740  | 4.370267 | 3.547697  |
| Cu | -2.215061 | 1.090351 | -3.836598  | C | -5.252599 | 4.409375 | -5.657177 |
| Cu | -2.215061 | 1.090351 | 3.836598   | C | -5.252599 | 4.409375 | 5.657177  |
| Cu | 0.000000  | 1.067131 | 0.000000   | C | 5.622124  | 4.455029 | -5.621083 |
| H  | -2.033407 | 3.439537 | -5.049510  | C | 5.622124  | 4.455029 | 5.621083  |
| H  | -2.033407 | 3.439537 | 5.049510   | H | -6.000074 | 4.395734 | -6.453389 |

|   |           |          |           |    |           |           |            |
|---|-----------|----------|-----------|----|-----------|-----------|------------|
| H | -6.000074 | 4.395734 | 6.453389  | Ag | -3.336202 | -1.641274 | -2.889240  |
| H | 6.378724  | 4.460467 | -6.408469 | Ag | -0.834054 | -1.641274 | -4.333856  |
| H | 6.378724  | 4.460467 | 6.408469  | Ag | 9.174558  | -1.641273 | -1.444606  |
| C | 0.850339  | 5.187219 | -4.018859 | Ag | -5.838345 | -1.641273 | 7.223097   |
| C | -0.512709 | 5.196463 | -4.013708 | Ag | 9.174558  | -1.641273 | 1.444606   |
| C | 0.850339  | 5.187219 | 4.018859  | Ag | -3.336213 | -1.641273 | 8.667703   |
| C | -0.512709 | 5.196463 | 4.013708  | Ag | -5.838345 | -1.641273 | -7.223097  |
| C | -4.599444 | 4.937818 | -3.370715 | Ag | -3.336213 | -1.641273 | -8.667703  |
| C | -4.599444 | 4.937818 | 3.370715  | Ag | 6.672402  | -1.641271 | -2.889230  |
| C | 4.932106  | 4.965769 | -3.342126 | Ag | -5.838348 | -1.641271 | 4.333854   |
| C | 4.932106  | 4.965769 | 3.342126  | Ag | 6.672402  | -1.641271 | 2.889230   |
| C | -5.559409 | 4.933243 | -4.391369 | Ag | -0.834054 | -1.641271 | 7.223084   |
| C | -5.559409 | 4.933243 | 4.391369  | Ag | -5.838348 | -1.641271 | -4.333854  |
| C | 5.904040  | 4.981769 | -4.351489 | Ag | -0.834054 | -1.641271 | -7.223084  |
| C | 5.904040  | 4.981769 | 4.351489  | Ag | 11.676697 | -1.641269 | -2.889229  |
| H | 1.510412  | 5.665262 | -4.735782 | Ag | -8.340494 | -1.641269 | 8.667702   |
| H | -1.171185 | 5.684383 | -4.725353 | Ag | 11.676697 | -1.641269 | 2.889229   |
| H | 1.510412  | 5.665262 | 4.735782  | Ag | -3.336203 | -1.641269 | 11.556930  |
| H | -1.171185 | 5.684383 | 4.725353  | Ag | -8.340494 | -1.641269 | -8.667702  |
| H | -4.837403 | 5.418834 | -2.422055 | Ag | -3.336203 | -1.641269 | -11.556930 |
| H | -4.837403 | 5.418834 | 2.422055  | Ag | 6.672412  | -1.641266 | 0.000000   |
| H | 5.149857  | 5.447322 | -2.388692 | Ag | -3.336206 | -1.641266 | 5.778479   |
| H | 5.149857  | 5.447322 | 2.388692  | Ag | -3.336206 | -1.641266 | -5.778479  |
| H | -6.545452 | 5.362555 | -4.201567 | Ag | 11.676702 | -1.641265 | 0.000000   |
| H | -6.545452 | 5.362555 | 4.201567  | Ag | -5.838351 | -1.641265 | 10.112321  |
| H | 6.879476  | 5.428928 | -4.149203 | Ag | -5.838351 | -1.641265 | -10.112321 |
| H | 6.879476  | 5.428928 | 4.149203  | Ag | 1.668100  | -1.641263 | 2.889235   |

S7- Ag(111)-TPP

E= -823.67750703 eV Symmetry: C<sub>s</sub>

|    |            |           |            |    |            |           |            |
|----|------------|-----------|------------|----|------------|-----------|------------|
| Ag | 1.668103   | -1.641278 | 0.000000   | Ag | 1.668100   | -1.641263 | -2.889235  |
| Ag | -0.834052  | -1.641278 | 1.444620   | Ag | 1.668100   | -1.641263 | 0.000000   |
| Ag | -0.834052  | -1.641278 | -1.444620  | Ag | -3.336201  | -1.641263 | 0.000000   |
| Ag | 9.174555   | -1.641277 | -4.333848  | Ag | 1.668103   | -1.641259 | 5.778477   |
| Ag | -8.340500  | -1.641277 | 5.778474   | Ag | 4.170256   | -1.641259 | 4.333858   |
| Ag | 9.174555   | -1.641277 | 4.333848   | Ag | 1.668103   | -1.641259 | -5.778477  |
| Ag | -0.834055  | -1.641277 | 10.112322  | Ag | -5.838359  | -1.641259 | -1.444619  |
| Ag | -8.340500  | -1.641277 | -5.778474  | Ag | 4.170256   | -1.641259 | -4.333858  |
| Ag | -0.834055  | -1.641277 | -10.112322 | Ag | -5.838359  | -1.641259 | 1.444619   |
| Ag | 11.676708  | -1.641274 | -5.778467  | Ag | 1.668099   | -1.641254 | 8.667711   |
| Ag | -10.842654 | -1.641274 | 7.223092   | Ag | 6.672408   | -1.641254 | 5.778472   |
| Ag | 11.676708  | -1.641274 | 5.778467   | Ag | 1.668099   | -1.641254 | -8.667711  |
| Ag | -0.834054  | -1.641274 | 13.001559  | Ag | -8.340507  | -1.641254 | -2.889239  |
| Ag | -10.842654 | -1.641274 | -7.223092  | Ag | 6.672408   | -1.641254 | -5.778472  |
| Ag | -0.834054  | -1.641274 | -13.001559 | Ag | -8.340507  | -1.641254 | 2.889239   |
| Ag | 4.170256   | -1.641274 | -1.444616  | Ag | 4.170254   | -1.641251 | 7.223091   |
| Ag | -3.336202  | -1.641274 | 2.889240   | Ag | 4.170254   | -1.641251 | -7.223091  |
| Ag | 4.170256   | -1.641274 | 1.444616   | Ag | -8.340507  | -1.641251 | 0.000000   |
| Ag | -0.834054  | -1.641274 | 4.333856   | Ag | 1.668105   | -1.641250 | 11.556939  |
|    |            |           |            | Ag | 9.174550   | -1.641250 | 7.223091   |
|    |            |           |            | Ag | 1.668105   | -1.641250 | -11.556939 |
|    |            |           |            | Ag | -10.842655 | -1.641250 | -4.333848  |
|    |            |           |            | Ag | 9.174550   | -1.641250 | -7.223091  |

|    |            |           |            |    |            |          |            |
|----|------------|-----------|------------|----|------------|----------|------------|
| Ag | -10.842655 | -1.641250 | 4.333848   | Ag | 13.377237  | 0.744213 | 4.506497   |
| Ag | 4.170250   | -1.641246 | 10.112325  | Ag | -2.785877  | 0.744213 | 13.838275  |
| Ag | 6.672406   | -1.641246 | 8.667705   | Ag | -10.591360 | 0.744213 | -9.331778  |
| Ag | 4.170250   | -1.641246 | -10.112325 | Ag | -2.785877  | 0.744213 | -13.838275 |
| Ag | -10.842656 | -1.641246 | -1.444620  | Ag | 10.604750  | 1.192095 | 0.000000   |
| Ag | 6.672406   | -1.641246 | -8.667705  | Ag | -5.302375  | 1.192095 | 9.183983   |
| Ag | -10.842656 | -1.641246 | 1.444620   | Ag | -5.302375  | 1.192095 | -9.183983  |
| Ag | 13.185879  | 0.422179  | -7.543353  | Ag | 7.970762   | 1.195784 | -1.526104  |
| Ag | -13.125675 | 0.422179  | 7.647630   | Ag | -5.307026  | 1.195784 | 6.139831   |
| Ag | 13.185879  | 0.422179  | 7.543353   | Ag | 7.970762   | 1.195784 | 1.526104   |
| Ag | -0.060204  | 0.422179  | 15.190983  | Ag | -2.663737  | 1.195784 | 7.665935   |
| Ag | -13.125675 | 0.422179  | -7.647630  | Ag | -5.307026  | 1.195784 | -6.139831  |
| Ag | -0.060204  | 0.422179  | -15.190983 | Ag | -2.663737  | 1.195784 | -7.665935  |
| Ag | 7.967890   | 1.220392  | -4.553228  | Ag | 13.381081  | 0.722624 | -1.505266  |
| Ag | -7.927156  | 1.220392  | 4.623781   | Ag | -7.994139  | 0.722624 | 10.835723  |
| Ag | 7.967890   | 1.220392  | 4.553228   | Ag | 13.381081  | 0.722624 | 1.505266   |
| Ag | -0.040734  | 1.220392  | 9.177009   | Ag | -5.386942  | 0.722624 | 12.340989  |
| Ag | -7.927156  | 1.220392  | -4.623781  | Ag | -7.994139  | 0.722624 | -10.835723 |
| Ag | -0.040734  | 1.220392  | -9.177009  | Ag | -5.386942  | 0.722624 | -12.340989 |
| Ag | 2.652585   | 1.109313  | -1.525809  | Ag | 2.632687   | 1.203998 | 4.559948   |
| Ag | -2.647682  | 1.109313  | 1.534302   | Ag | 2.632687   | 1.203998 | -4.559948  |
| Ag | 2.652585   | 1.109313  | 1.525809   | Ag | -5.265374  | 1.203998 | 0.000000   |
| Ag | -0.004903  | 1.109313  | 3.060111   | Ag | 2.608606   | 1.238807 | 7.620201   |
| Ag | -2.647682  | 1.109313  | -1.534302  | Ag | 5.294985   | 1.238807 | 6.069220   |
| Ag | -0.004903  | 1.109313  | -3.060111  | Ag | 2.608606   | 1.238807 | -7.620201  |
| Ag | 10.586752  | 1.278114  | -6.048115  | Ag | -7.903591  | 1.238807 | -1.550982  |
| Ag | -10.531197 | 1.278114  | 6.144339   | Ag | 5.294985   | 1.238807 | -6.069220  |
| Ag | 10.586752  | 1.278114  | 6.048115   | Ag | -7.903591  | 1.238807 | 1.550982   |
| Ag | -0.055555  | 1.278114  | 12.192454  | Ag | 2.586859   | 1.232308 | 10.659570  |
| Ag | -10.531197 | 1.278114  | -6.144339  | Ag | 7.938029   | 1.232308 | 7.570071   |
| Ag | -0.055555  | 1.278114  | -12.192454 | Ag | 2.586859   | 1.232308 | -10.659570 |
| Ag | 5.321744   | 1.213580  | -3.048868  | Ag | -10.524888 | 1.232308 | -3.089499  |
| Ag | -5.301269  | 1.213580  | 3.084331   | Ag | 7.938029   | 1.232308 | -7.570071  |
| Ag | 5.321744   | 1.213580  | 3.048868   | Ag | -10.524888 | 1.232308 | 3.089499   |
| Ag | -0.020475  | 1.213580  | 6.133199   | Ag | 5.252888   | 1.194784 | 9.098269   |
| Ag | -5.301269  | 1.213580  | -3.084331  | Ag | 5.252888   | 1.194784 | -9.098269  |
| Ag | -0.020475  | 1.213580  | -6.133199  | Ag | -10.505777 | 1.194784 | 0.000000   |
| Ag | 10.633781  | 1.246795  | -3.047499  | Ag | 2.554869   | 0.199030 | 13.731559  |
| Ag | -7.956102  | 1.246795  | 7.685375   | Ag | 10.614444  | 0.199030 | 9.078361   |
| Ag | 10.633781  | 1.246795  | 3.047499   | Ag | 2.554869   | 0.199030 | -13.731559 |
| Ag | -2.677679  | 1.246795  | 10.732874  | Ag | -13.169314 | 0.199030 | -4.653198  |
| Ag | -7.956102  | 1.246795  | -7.685375  | Ag | 10.614444  | 0.199030 | -9.078361  |
| Ag | -2.677679  | 1.246795  | -10.732874 | Ag | -13.169314 | 0.199030 | 4.653198   |
| Ag | 0.000000   | 0.986107  | 0.000000   | Ag | 5.182871   | 0.251160 | 12.158823  |
| Ag | 5.301928   | 1.221224  | 0.000000   | Ag | 7.938414   | 0.251160 | 10.567909  |
| Ag | -2.650964  | 1.221224  | 4.591604   | Ag | 5.182871   | 0.251160 | -12.158823 |
| Ag | -2.650964  | 1.221224  | -4.591604  | Ag | -13.121285 | 0.251160 | -1.590914  |
| Ag | 13.377237  | 0.744213  | -4.506497  | Ag | 7.938414   | 0.251160 | -10.567909 |
| Ag | -10.591360 | 0.744213  | 9.331778   | Ag | -13.121285 | 0.251160 | 1.590914   |

|   |           |          |           |   |           |          |           |
|---|-----------|----------|-----------|---|-----------|----------|-----------|
| H | -1.895525 | 3.735312 | 5.063171  | C | -0.680402 | 4.778358 | -2.818113 |
| H | -1.895525 | 3.735312 | -5.063171 | C | -5.043488 | 4.947005 | 5.593452  |
| H | 2.752083  | 3.732729 | 5.059262  | C | -5.043488 | 4.947005 | -5.593452 |
| H | 2.752083  | 3.732729 | -5.059262 | H | -5.804259 | 5.011337 | 6.375016  |
| H | -3.600905 | 3.922864 | 6.843675  | H | -5.804259 | 5.011337 | -6.375016 |
| H | -3.600905 | 3.922864 | -6.843675 | C | 5.115065  | 5.474178 | 3.326589  |
| H | 4.407679  | 4.013925 | 6.860815  | C | 5.115065  | 5.474178 | -3.326589 |
| H | 4.407679  | 4.013925 | -6.860815 | C | 6.069658  | 5.614264 | 4.341625  |
| H | 5.530271  | 3.931102 | -1.339215 | C | 6.069658  | 5.614264 | -4.341625 |
| H | 5.530271  | 3.931102 | 1.339215  | C | -4.307252 | 5.402066 | 3.318533  |
| H | -4.672448 | 3.859610 | 1.339456  | C | -4.307252 | 5.402066 | -3.318533 |
| H | -4.672448 | 3.859610 | -1.339456 | C | -5.280294 | 5.491789 | 4.321046  |
| C | 4.675182  | 4.085752 | 0.691925  | C | -5.280294 | 5.491789 | -4.321046 |
| C | 4.675182  | 4.085752 | -0.691925 | C | -0.264715 | 5.458801 | 4.042624  |
| C | -3.826753 | 4.053162 | 0.690938  | C | -0.264715 | 5.458801 | -4.042624 |
| C | -3.826753 | 4.053162 | -0.690938 | C | 1.097207  | 5.465841 | 4.039218  |
| C | -2.850430 | 4.216187 | 4.841017  | C | 1.097207  | 5.465841 | -4.039218 |
| C | -2.850430 | 4.216187 | -4.841017 | H | 6.991302  | 6.164591 | 4.139007  |
| C | 3.687241  | 4.252416 | 4.843167  | H | 6.991302  | 6.164591 | -4.139007 |
| C | 3.687241  | 4.252416 | -4.843167 | H | 5.287407  | 5.954192 | 2.362463  |
| C | 4.624687  | 4.417369 | 5.868546  | H | 5.287407  | 5.954192 | -2.362463 |
| C | 4.624687  | 4.417369 | -5.868546 | H | -0.924017 | 5.929959 | 4.765223  |
| C | -3.810924 | 4.333997 | 5.854128  | H | -0.924017 | 5.929959 | -4.765223 |
| C | -3.810924 | 4.333997 | -5.854128 | H | 1.753796  | 5.942857 | 4.760250  |
| C | 3.330968  | 4.319916 | -1.145430 | H | 1.753796  | 5.942857 | -4.760250 |
| C | 3.330968  | 4.319916 | 1.145430  | H | -4.485105 | 5.887515 | 2.358560  |
| C | -2.489768 | 4.320487 | 1.144094  | H | -4.485105 | 5.887515 | -2.358560 |
| C | -2.489768 | 4.320487 | -1.144094 | H | -6.220156 | 6.008118 | 4.112423  |
| N | 0.419105  | 4.407650 | 2.065394  | H | -6.220156 | 6.008118 | -4.112423 |
| N | 0.419105  | 4.407650 | -2.065394 |   |           |          |           |
| N | 2.550977  | 4.386455 | 0.000000  |   |           |          |           |
| N | -1.712154 | 4.410620 | 0.000000  |   |           |          |           |
| H | -0.704076 | 4.550891 | 0.000000  |   |           |          |           |
| C | 2.884511  | 4.585897 | 2.468871  |   |           |          |           |
| C | 2.884511  | 4.585897 | -2.468871 |   |           |          |           |
| C | -2.048002 | 4.582131 | 2.470076  |   |           |          |           |
| C | -2.048002 | 4.582131 | -2.470076 |   |           |          |           |
| H | 1.539076  | 4.502951 | 0.000000  |   |           |          |           |
| C | 3.911297  | 4.760995 | 3.541338  |   |           |          |           |
| C | 3.911297  | 4.760995 | -3.541338 |   |           |          |           |
| C | -3.080561 | 4.729295 | 3.539774  |   |           |          |           |
| C | -3.080561 | 4.729295 | -3.539774 |   |           |          |           |
| C | 5.835045  | 5.079115 | 5.617818  |   |           |          |           |
| C | 5.835045  | 5.079115 | -5.617818 |   |           |          |           |
| H | 6.579345  | 5.187666 | 6.409658  |   |           |          |           |
| H | 6.579345  | 5.187666 | -6.409658 |   |           |          |           |
| C | 1.515570  | 4.783503 | 2.815636  |   |           |          |           |
| C | 1.515570  | 4.783503 | -2.815636 |   |           |          |           |
| C | -0.680402 | 4.778358 | 2.818113  |   |           |          |           |

S8- Benzene Dimer  
E= -147.61618987 eV

|   |           |           |           |
|---|-----------|-----------|-----------|
| H | 0.965485  | -0.839188 | 2.188888  |
| C | 0.436542  | -0.932293 | 1.236708  |
| C | -0.943494 | -1.189527 | 1.222021  |
| H | -1.489074 | -1.298908 | 2.162880  |
| C | -1.623784 | -1.302856 | -0.000680 |
| H | -2.698982 | -1.500725 | -0.012122 |
| C | -0.922975 | -1.158500 | -1.208889 |
| H | -1.452549 | -1.243432 | -2.161353 |
| C | 0.456923  | -0.901190 | -1.193919 |
| H | 1.001834  | -0.783792 | -2.134307 |
| C | 1.136458  | -0.787976 | 0.028824  |
| H | 2.209793  | -0.580920 | 0.040502  |
| H | 1.553628  | 4.233294  | 2.161717  |
| C | 1.023484  | 4.152424  | 1.209115  |
| C | -0.357054 | 3.899409  | 1.193669  |
| H | -0.901908 | 3.780595  | 2.133946  |
| C | -1.036919 | 3.792425  | -0.029319 |

|   |           |          |           |
|---|-----------|----------|-----------|
| H | -2.110367 | 3.588855 | -0.041031 |
| C | -0.336995 | 3.938023 | -1.237017 |
| H | -0.866234 | 3.849806 | -2.189227 |
| C | 1.043533  | 4.191417 | -1.221984 |
| H | 1.589460  | 4.302948 | -2.162577 |
| C | 1.723888  | 4.297748 | 0.001163  |
| H | 2.799327  | 4.492364 | 0.013014  |

S9-2H-TPP

E= -521.97873833 eV Symmetry: C<sub>2v</sub>

|   |           |           |           |
|---|-----------|-----------|-----------|
| C | -2.452318 | 2.471657  | 0.019009  |
| C | -2.907704 | 1.136394  | 0.006986  |
| C | -1.093497 | 2.874835  | 0.036864  |
| C | -4.270732 | 0.688210  | -0.093962 |
| C | -4.270732 | -0.688210 | -0.093962 |
| C | -2.907704 | -1.136394 | 0.006986  |
| C | -0.680818 | 4.275988  | 0.147679  |
| C | 0.680818  | 4.275988  | 0.147679  |
| C | 1.093497  | 2.874835  | 0.036864  |
| N | -2.123466 | 0.000000  | 0.064439  |
| H | -1.104977 | 0.000000  | 0.075067  |
| H | -5.128234 | 1.348272  | -0.176076 |
| H | -5.128234 | -1.348272 | -0.176076 |
| N | 0.000000  | 2.040719  | -0.017192 |
| H | -1.346545 | 5.129081  | 0.239989  |
| H | 1.346545  | 5.129081  | 0.239989  |
| C | -2.452318 | -2.471657 | 0.019009  |
| C | -1.093497 | -2.874835 | 0.036864  |
| C | -0.680818 | -4.275988 | 0.147679  |
| C | 0.680818  | -4.275988 | 0.147679  |
| C | 1.093497  | -2.874835 | 0.036864  |
| N | 0.000000  | -2.040719 | -0.017192 |
| H | -1.346545 | -5.129081 | 0.239989  |
| H | 1.346545  | -5.129081 | 0.239989  |
| C | 2.452318  | 2.471657  | 0.019009  |
| C | 4.270732  | 0.688210  | -0.093962 |
| C | 4.270732  | -0.688210 | -0.093962 |
| C | 2.907704  | -1.136394 | 0.006986  |
| N | 2.123466  | 0.000000  | 0.064439  |
| H | 5.128234  | -1.348272 | -0.176076 |
| C | 2.452318  | -2.471657 | 0.019009  |
| C | 2.907704  | 1.136394  | 0.006986  |
| H | 5.128234  | 1.348272  | -0.176076 |
| H | 1.104977  | 0.000000  | 0.075067  |
| C | 3.508973  | 3.535430  | 0.009818  |
| C | 3.608055  | 4.440097  | -1.065809 |
| C | 4.425488  | 3.650022  | 1.073830  |
| C | 4.597645  | 5.432205  | -1.078128 |
| C | 5.413301  | 4.644195  | 1.065277  |

|   |           |           |           |
|---|-----------|-----------|-----------|
| C | 5.503858  | 5.538833  | -0.011872 |
| H | 2.897836  | 4.358176  | -1.890858 |
| H | 4.353843  | 2.951491  | 1.910021  |
| H | 4.662405  | 6.120333  | -1.923896 |
| H | 6.108287  | 4.723348  | 1.904178  |
| H | 6.274368  | 6.313572  | -0.019994 |
| C | 3.508973  | -3.535430 | 0.009818  |
| C | 3.608055  | -4.440097 | -1.065809 |
| C | 4.425488  | -3.650022 | 1.073830  |
| C | 4.597645  | -5.432205 | -1.078128 |
| C | 5.413301  | -4.644195 | 1.065277  |
| C | 5.503858  | -5.538833 | -0.011872 |
| H | 2.897836  | -4.358176 | -1.890858 |
| H | 4.353843  | -2.951491 | 1.910021  |
| H | 4.662405  | -6.120333 | -1.923896 |
| H | 6.108287  | -4.723348 | 1.904178  |
| H | 6.274368  | -6.313572 | -0.019994 |
| C | -3.508973 | 3.535430  | 0.009818  |
| C | -3.608055 | 4.440097  | -1.065809 |
| C | -4.425488 | 3.650022  | 1.073830  |
| C | -4.597645 | 5.432205  | -1.078128 |
| C | -5.413301 | 4.644195  | 1.065277  |
| C | -5.503858 | 5.538833  | -0.011872 |
| H | -2.897836 | 4.358176  | -1.890858 |
| H | -4.353843 | 2.951491  | 1.910021  |
| H | -4.662405 | 6.120333  | -1.923896 |
| H | -6.108287 | 4.723348  | 1.904178  |
| H | -6.274368 | 6.313572  | -0.019994 |
| C | -3.508973 | -3.535430 | 0.009818  |
| C | -3.608055 | -4.440097 | -1.065809 |
| C | -4.425488 | -3.650022 | 1.073830  |
| C | -4.597645 | -5.432205 | -1.078128 |
| C | -5.413301 | -4.644195 | 1.065277  |
| C | -5.503858 | -5.538833 | -0.011872 |
| H | -2.897836 | -4.358176 | -1.890858 |
| H | -4.353843 | -2.951491 | 1.910021  |
| H | -4.662405 | -6.120333 | -1.923896 |
| H | -6.108287 | -4.723348 | 1.904178  |
| H | -6.274368 | -6.313572 | -0.019994 |

S10- Cu(111)-166 Surface Cluster

E= -429.86498153 eV Symmetry: C<sub>s</sub>

|    |           |           |            |
|----|-----------|-----------|------------|
| Cu | 8.105765  | -1.142575 | 6.381640   |
| Cu | 8.105765  | -1.142575 | -6.381640  |
| Cu | 1.473780  | -1.142575 | 10.210618  |
| Cu | 1.473780  | -1.142575 | -10.210618 |
| Cu | -9.579545 | -1.142575 | -3.828978  |
| Cu | -9.579545 | -1.142575 | 3.828978   |
| Cu | 5.895106  | -1.142573 | 7.657964   |

|    |           |           |            |    |            |           |            |
|----|-----------|-----------|------------|----|------------|-----------|------------|
| Cu | 5.895106  | -1.142573 | -7.657964  | Cu | -2.947552  | -1.142563 | 7.657965   |
| Cu | 3.684439  | -1.142573 | 8.934294   | Cu | -2.947552  | -1.142563 | -7.657965  |
| Cu | 3.684439  | -1.142573 | -8.934294  | Cu | -5.158216  | -1.142563 | 6.381637   |
| Cu | -9.579545 | -1.142573 | -1.276329  | Cu | -5.158216  | -1.142563 | -6.381637  |
| Cu | -9.579545 | -1.142573 | 1.276329   | Cu | 3.684441   | -1.142562 | 1.276321   |
| Cu | 5.895105  | -1.142571 | 5.105304   | Cu | 3.684441   | -1.142562 | -1.276321  |
| Cu | 5.895105  | -1.142571 | -5.105304  | Cu | -0.736894  | -1.142562 | 3.828980   |
| Cu | 1.473770  | -1.142571 | 7.657963   | Cu | -0.736894  | -1.142562 | -3.828980  |
| Cu | 1.473770  | -1.142571 | -7.657963  | Cu | -2.947547  | -1.142562 | 2.552659   |
| Cu | -7.368876 | -1.142571 | -2.552659  | Cu | -2.947547  | -1.142562 | -2.552659  |
| Cu | -7.368876 | -1.142571 | 2.552659   | Cu | 10.316427  | -1.142561 | 0.000000   |
| Cu | 10.316433 | -1.142569 | -5.105310  | Cu | -5.158214  | -1.142561 | 8.934288   |
| Cu | 10.316433 | -1.142569 | 5.105310   | Cu | -5.158214  | -1.142561 | -8.934288  |
| Cu | 3.684438  | -1.142569 | 6.381633   | Cu | 5.895100   | -1.142560 | 0.000000   |
| Cu | 3.684438  | -1.142569 | -6.381633  | Cu | 1.473778   | -1.142560 | 0.000000   |
| Cu | -0.736888 | -1.142569 | 11.486948  | Cu | -0.736889  | -1.142560 | 1.276329   |
| Cu | -0.736888 | -1.142569 | -11.486948 | Cu | -0.736889  | -1.142560 | -1.276329  |
| Cu | -7.368876 | -1.142569 | 0.000000   | Cu | -2.947550  | -1.142560 | 5.105306   |
| Cu | -9.579545 | -1.142569 | 6.381637   | Cu | -2.947550  | -1.142560 | -5.105306  |
| Cu | -9.579545 | -1.142569 | -6.381637  | Cu | 8.842651   | 0.941652  | 7.657964   |
| Cu | 3.684442  | -1.142567 | 3.828982   | Cu | 8.842651   | 0.941652  | -7.657964  |
| Cu | 3.684442  | -1.142567 | -3.828982  | Cu | 2.210666   | 0.941652  | 11.486943  |
| Cu | 1.473774  | -1.142567 | 5.105311   | Cu | 2.210666   | 0.941652  | -11.486943 |
| Cu | 1.473774  | -1.142567 | -5.105311  | Cu | -11.053317 | 0.941652  | -3.828978  |
| Cu | -5.158216 | -1.142567 | -1.276329  | Cu | -11.053317 | 0.941652  | 3.828978   |
| Cu | -5.158216 | -1.142567 | 1.276329   | Cu | 6.631992   | 0.941654  | 8.934289   |
| Cu | 8.105764  | -1.142566 | -3.828979  | Cu | 6.631992   | 0.941654  | -8.934289  |
| Cu | 8.105764  | -1.142566 | 3.828979   | Cu | 4.421325   | 0.941654  | 10.210618  |
| Cu | -0.736889 | -1.142566 | 8.934287   | Cu | 4.421325   | 0.941654  | -10.210618 |
| Cu | -0.736889 | -1.142566 | -8.934287  | Cu | -11.053317 | 0.941654  | -1.276329  |
| Cu | -7.368876 | -1.142566 | 5.105308   | Cu | -11.053317 | 0.941654  | 1.276329   |
| Cu | -7.368876 | -1.142566 | -5.105308  | Cu | 6.631996   | 0.941656  | 6.381637   |
| Cu | 10.316432 | -1.142565 | -2.552650  | Cu | 6.631996   | 0.941656  | -6.381637  |
| Cu | 10.316432 | -1.142565 | 2.552650   | Cu | 2.210661   | 0.941656  | 8.934296   |
| Cu | -2.947556 | -1.142565 | 10.210617  | Cu | 2.210661   | 0.941656  | -8.934296  |
| Cu | -2.947556 | -1.142565 | -10.210617 | Cu | -8.842658  | 0.941656  | -2.552659  |
| Cu | -7.368876 | -1.142565 | 7.657967   | Cu | -8.842658  | 0.941656  | 2.552659   |
| Cu | -7.368876 | -1.142565 | -7.657967  | Cu | 11.053319  | 0.941658  | -6.381635  |
| Cu | 5.895101  | -1.142564 | 2.552657   | Cu | 11.053319  | 0.941658  | 6.381635   |
| Cu | 5.895101  | -1.142564 | -2.552657  | Cu | 4.421329   | 0.941658  | 7.657966   |
| Cu | -0.736884 | -1.142564 | 6.381636   | Cu | 4.421329   | 0.941658  | -7.657966  |
| Cu | -0.736884 | -1.142564 | -6.381636  | Cu | -0.000002  | 0.941658  | 12.763272  |
| Cu | -5.158216 | -1.142564 | 3.828978   | Cu | -0.000002  | 0.941658  | -12.763272 |
| Cu | -5.158216 | -1.142564 | -3.828978  | Cu | -8.842658  | 0.941658  | 0.000000   |
| Cu | 8.105768  | -1.142563 | 1.276328   | Cu | -11.053317 | 0.941658  | 6.381637   |
| Cu | 8.105768  | -1.142563 | -1.276328  | Cu | -11.053317 | 0.941658  | -6.381637  |
| Cu | 1.473774  | -1.142563 | 2.552651   | Cu | 4.421328   | 0.941660  | 5.105306   |
| Cu | 1.473774  | -1.142563 | -2.552651  | Cu | 4.421328   | 0.941660  | -5.105306  |
| Cu | -2.947547 | -1.142563 | 0.000000   | Cu | 2.210661   | 0.941660  | 6.381635   |

|    |           |          |            |
|----|-----------|----------|------------|
| Cu | 2.210661  | 0.941660 | -6.381635  |
| Cu | -6.631989 | 0.941660 | -1.276329  |
| Cu | -6.631989 | 0.941660 | 1.276329   |
| Cu | 8.842655  | 0.941661 | -5.105312  |
| Cu | 8.842655  | 0.941661 | 5.105312   |
| Cu | 0.000003  | 0.941661 | 10.210620  |
| Cu | 0.000003  | 0.941661 | -10.210620 |
| Cu | -8.842658 | 0.941661 | 5.105308   |
| Cu | -8.842658 | 0.941661 | -5.105308  |
| Cu | 11.053323 | 0.941662 | -3.828983  |
| Cu | 11.053323 | 0.941662 | 3.828983   |
| Cu | -2.210665 | 0.941662 | 11.486950  |
| Cu | -2.210665 | 0.941662 | -11.486950 |
| Cu | -8.842658 | 0.941662 | 7.657967   |
| Cu | -8.842658 | 0.941662 | -7.657967  |
| Cu | 6.631987  | 0.941663 | -3.828981  |
| Cu | 6.631987  | 0.941663 | 3.828981   |
| Cu | 0.000002  | 0.941663 | 7.657960   |
| Cu | 0.000002  | 0.941663 | -7.657960  |
| Cu | -6.631989 | 0.941663 | 3.828978   |
| Cu | -6.631989 | 0.941663 | -3.828978  |
| Cu | 2.210665  | 0.941664 | 3.828984   |
| Cu | 2.210665  | 0.941664 | -3.828984  |
| Cu | -4.421330 | 0.941664 | 0.000000   |
| Cu | 8.842655  | 0.941665 | -2.552652  |
| Cu | 8.842655  | 0.941665 | 2.552652   |
| Cu | 4.421332  | 0.941665 | 2.552654   |
| Cu | 4.421332  | 0.941665 | -2.552654  |
| Cu | -0.000003 | 0.941665 | 5.105313   |
| Cu | -0.000003 | 0.941665 | -5.105313  |
| Cu | -2.210666 | 0.941665 | 8.934289   |
| Cu | -2.210666 | 0.941665 | -8.934289  |
| Cu | -4.421330 | 0.941665 | 2.552659   |
| Cu | -4.421330 | 0.941665 | -2.552659  |
| Cu | -6.631989 | 0.941665 | 6.381637   |
| Cu | -6.631989 | 0.941665 | -6.381637  |
| Cu | 11.053313 | 0.941666 | -1.276327  |
| Cu | 11.053313 | 0.941666 | 1.276327   |
| Cu | -4.421325 | 0.941666 | 10.210614  |
| Cu | -4.421325 | 0.941666 | -10.210614 |
| Cu | -6.631989 | 0.941666 | 8.934286   |
| Cu | -6.631989 | 0.941666 | -8.934286  |
| Cu | 6.631991  | 0.941667 | 1.276330   |
| Cu | 6.631991  | 0.941667 | -1.276330  |
| Cu | -2.210662 | 0.941667 | 6.381638   |
| Cu | -2.210662 | 0.941667 | -6.381638  |
| Cu | -4.421330 | 0.941667 | 5.105308   |
| Cu | -4.421330 | 0.941667 | -5.105308  |
| Cu | 8.842659  | 0.941668 | 0.000000   |

|    |           |          |           |
|----|-----------|----------|-----------|
| Cu | 2.210664  | 0.941668 | 1.276323  |
| Cu | 2.210664  | 0.941668 | -1.276323 |
| Cu | -0.000004 | 0.941668 | 2.552653  |
| Cu | -0.000004 | 0.941668 | -2.552653 |
| Cu | -2.210660 | 0.941668 | 1.276329  |
| Cu | -2.210660 | 0.941668 | -1.276329 |
| Cu | -4.421329 | 0.941668 | 7.657967  |
| Cu | -4.421329 | 0.941668 | -7.657967 |
| Cu | 4.421323  | 0.941669 | 0.000000  |
| Cu | -2.210661 | 0.941669 | 3.828978  |
| Cu | -2.210661 | 0.941669 | -3.828978 |
| Cu | 0.000000  | 0.941670 | 0.000000  |

S11- Ag(111)-166 Surface Cluster

E= -298.19021653 eV Symmetry: C<sub>s</sub>

|    |            |           |            |
|----|------------|-----------|------------|
| Ag | 1.668103   | -1.641278 | 0.000000   |
| Ag | -0.834052  | -1.641278 | 1.444620   |
| Ag | -0.834052  | -1.641278 | -1.444620  |
| Ag | 9.174555   | -1.641277 | -4.333848  |
| Ag | -8.340500  | -1.641277 | 5.778474   |
| Ag | 9.174555   | -1.641277 | 4.333848   |
| Ag | -0.834055  | -1.641277 | 10.112322  |
| Ag | -8.340500  | -1.641277 | -5.778474  |
| Ag | -0.834055  | -1.641277 | -10.112322 |
| Ag | 11.676708  | -1.641274 | -5.778467  |
| Ag | -10.842654 | -1.641274 | 7.223092   |
| Ag | 11.676708  | -1.641274 | 5.778467   |
| Ag | -0.834054  | -1.641274 | 13.001559  |
| Ag | -10.842654 | -1.641274 | -7.223092  |
| Ag | -0.834054  | -1.641274 | -13.001559 |
| Ag | 4.170256   | -1.641274 | -1.444616  |
| Ag | -3.336202  | -1.641274 | 2.889240   |
| Ag | 4.170256   | -1.641274 | 1.444616   |
| Ag | -0.834054  | -1.641274 | 4.333856   |
| Ag | -3.336202  | -1.641274 | -2.889240  |
| Ag | -0.834054  | -1.641274 | -4.333856  |
| Ag | 9.174558   | -1.641273 | -1.444606  |
| Ag | -5.838345  | -1.641273 | 7.223097   |
| Ag | 9.174558   | -1.641273 | 1.444606   |
| Ag | -3.336213  | -1.641273 | 8.667703   |
| Ag | -5.838345  | -1.641273 | -7.223097  |
| Ag | -3.336213  | -1.641273 | -8.667703  |
| Ag | 6.672402   | -1.641271 | -2.889230  |
| Ag | -5.838348  | -1.641271 | 4.333854   |
| Ag | 6.672402   | -1.641271 | 2.889230   |
| Ag | -0.834054  | -1.641271 | 7.223084   |
| Ag | -5.838348  | -1.641271 | -4.333854  |
| Ag | -0.834054  | -1.641271 | -7.223084  |
| Ag | 11.676697  | -1.641269 | -2.889229  |

|    |            |           |            |    |            |          |            |
|----|------------|-----------|------------|----|------------|----------|------------|
| Ag | -8.340494  | -1.641269 | 8.667702   | Ag | 7.967890   | 1.220392 | 4.553228   |
| Ag | 11.676697  | -1.641269 | 2.889229   | Ag | -0.040734  | 1.220392 | 9.177009   |
| Ag | -3.336203  | -1.641269 | 11.556930  | Ag | -7.927156  | 1.220392 | -4.623781  |
| Ag | -8.340494  | -1.641269 | -8.667702  | Ag | -0.040734  | 1.220392 | -9.177009  |
| Ag | -3.336203  | -1.641269 | -11.556930 | Ag | 2.652585   | 1.109313 | -1.525809  |
| Ag | 6.672412   | -1.641266 | 0.000000   | Ag | -2.647682  | 1.109313 | 1.534302   |
| Ag | -3.336206  | -1.641266 | 5.778479   | Ag | 2.652585   | 1.109313 | 1.525809   |
| Ag | -3.336206  | -1.641266 | -5.778479  | Ag | -0.004903  | 1.109313 | 3.060111   |
| Ag | 11.676702  | -1.641265 | 0.000000   | Ag | -2.647682  | 1.109313 | -1.534302  |
| Ag | -5.838351  | -1.641265 | 10.112321  | Ag | -0.004903  | 1.109313 | -3.060111  |
| Ag | -5.838351  | -1.641265 | -10.112321 | Ag | 10.586752  | 1.278114 | -6.048115  |
| Ag | 1.668100   | -1.641263 | 2.889235   | Ag | -10.531197 | 1.278114 | 6.144339   |
| Ag | 1.668100   | -1.641263 | -2.889235  | Ag | 10.586752  | 1.278114 | 6.048115   |
| Ag | -3.336201  | -1.641263 | 0.000000   | Ag | -0.055555  | 1.278114 | 12.192454  |
| Ag | 1.668103   | -1.641259 | 5.778477   | Ag | -10.531197 | 1.278114 | -6.144339  |
| Ag | 4.170256   | -1.641259 | 4.333858   | Ag | -0.055555  | 1.278114 | -12.192454 |
| Ag | 1.668103   | -1.641259 | -5.778477  | Ag | 5.321744   | 1.213580 | -3.048868  |
| Ag | -5.838359  | -1.641259 | -1.444619  | Ag | -5.301269  | 1.213580 | 3.084331   |
| Ag | 4.170256   | -1.641259 | -4.333858  | Ag | 5.321744   | 1.213580 | 3.048868   |
| Ag | -5.838359  | -1.641259 | 1.444619   | Ag | -0.020475  | 1.213580 | 6.133199   |
| Ag | 1.668099   | -1.641254 | 8.667711   | Ag | -5.301269  | 1.213580 | -3.084331  |
| Ag | 6.672408   | -1.641254 | 5.778472   | Ag | -0.020475  | 1.213580 | -6.133199  |
| Ag | 1.668099   | -1.641254 | -8.667711  | Ag | 10.633781  | 1.246795 | -3.047499  |
| Ag | -8.340507  | -1.641254 | -2.889239  | Ag | -7.956102  | 1.246795 | 7.685375   |
| Ag | 6.672408   | -1.641254 | -5.778472  | Ag | 10.633781  | 1.246795 | 3.047499   |
| Ag | -8.340507  | -1.641254 | 2.889239   | Ag | -2.677679  | 1.246795 | 10.732874  |
| Ag | 4.170254   | -1.641251 | 7.223091   | Ag | -7.956102  | 1.246795 | -7.685375  |
| Ag | 4.170254   | -1.641251 | -7.223091  | Ag | -2.677679  | 1.246795 | -10.732874 |
| Ag | -8.340507  | -1.641251 | 0.000000   | Ag | 0.000000   | 0.986107 | 0.000000   |
| Ag | 1.668105   | -1.641250 | 11.556939  | Ag | 5.301928   | 1.221224 | 0.000000   |
| Ag | 9.174550   | -1.641250 | 7.223091   | Ag | -2.650964  | 1.221224 | 4.591604   |
| Ag | 1.668105   | -1.641250 | -11.556939 | Ag | -2.650964  | 1.221224 | -4.591604  |
| Ag | -10.842655 | -1.641250 | -4.333848  | Ag | 13.377237  | 0.744213 | -4.506497  |
| Ag | 9.174550   | -1.641250 | -7.223091  | Ag | -10.591360 | 0.744213 | 9.331778   |
| Ag | -10.842655 | -1.641250 | 4.333848   | Ag | 13.377237  | 0.744213 | 4.506497   |
| Ag | 4.170250   | -1.641246 | 10.112325  | Ag | -2.785877  | 0.744213 | 13.838275  |
| Ag | 6.672406   | -1.641246 | 8.667705   | Ag | -10.591360 | 0.744213 | -9.331778  |
| Ag | 4.170250   | -1.641246 | -10.112325 | Ag | -2.785877  | 0.744213 | -13.838275 |
| Ag | -10.842656 | -1.641246 | -1.444620  | Ag | 10.604750  | 1.192095 | 0.000000   |
| Ag | 6.672406   | -1.641246 | -8.667705  | Ag | -5.302375  | 1.192095 | 9.183983   |
| Ag | -10.842656 | -1.641246 | 1.444620   | Ag | -5.302375  | 1.192095 | -9.183983  |
| Ag | 13.185879  | 0.422179  | -7.543353  | Ag | 7.970762   | 1.195784 | -1.526104  |
| Ag | -13.125675 | 0.422179  | 7.647630   | Ag | -5.307026  | 1.195784 | 6.139831   |
| Ag | 13.185879  | 0.422179  | 7.543353   | Ag | 7.970762   | 1.195784 | 1.526104   |
| Ag | -0.060204  | 0.422179  | 15.190983  | Ag | -2.663737  | 1.195784 | 7.665935   |
| Ag | -13.125675 | 0.422179  | -7.647630  | Ag | -5.307026  | 1.195784 | -6.139831  |
| Ag | -0.060204  | 0.422179  | -15.190983 | Ag | -2.663737  | 1.195784 | -7.665935  |
| Ag | 7.967890   | 1.220392  | -4.553228  | Ag | 13.381081  | 0.722624 | -1.505266  |
| Ag | -7.927156  | 1.220392  | 4.623781   | Ag | -7.994139  | 0.722624 | 10.835723  |



|    |            |          |            |    |            |          |            |
|----|------------|----------|------------|----|------------|----------|------------|
| Ag | 13.381081  | 0.722624 | 1.505266   | Ag | -10.524888 | 1.232308 | 3.089499   |
| Ag | -5.386942  | 0.722624 | 12.340989  | Ag | 5.252888   | 1.194784 | 9.098269   |
| Ag | -7.994139  | 0.722624 | -10.835723 | Ag | 5.252888   | 1.194784 | -9.098269  |
| Ag | -5.386942  | 0.722624 | -12.340989 | Ag | -10.505777 | 1.194784 | 0.000000   |
| Ag | 2.632687   | 1.203998 | 4.559948   | Ag | 2.554869   | 0.199030 | 13.731559  |
| Ag | 2.632687   | 1.203998 | -4.559948  | Ag | 10.614444  | 0.199030 | 9.078361   |
| Ag | -5.265374  | 1.203998 | 0.000000   | Ag | 2.554869   | 0.199030 | -13.731559 |
| Ag | 2.608606   | 1.238807 | 7.620201   | Ag | -13.169314 | 0.199030 | -4.653198  |
| Ag | 5.294985   | 1.238807 | 6.069220   | Ag | 10.614444  | 0.199030 | -9.078361  |
| Ag | 2.608606   | 1.238807 | -7.620201  | Ag | -13.169314 | 0.199030 | 4.653198   |
| Ag | -7.903591  | 1.238807 | -1.550982  | Ag | 5.182871   | 0.251160 | 12.158823  |
| Ag | 5.294985   | 1.238807 | -6.069220  | Ag | 7.938414   | 0.251160 | 10.567909  |
| Ag | -7.903591  | 1.238807 | 1.550982   | Ag | 5.182871   | 0.251160 | -12.158823 |
| Ag | 2.586859   | 1.232308 | 10.659570  | Ag | -13.121285 | 0.251160 | -1.590914  |
| Ag | 7.938029   | 1.232308 | 7.570071   | Ag | 7.938414   | 0.251160 | -10.567909 |
| Ag | 2.586859   | 1.232308 | -10.659570 | Ag | -13.121285 | 0.251160 | 1.59091    |
| Ag | -10.524888 | 1.232308 | -3.089499  |    |            |          |            |
| Ag | 7.938029   | 1.232308 | -7.570071  |    |            |          |            |

## References

- [1] te Velde, G.; Bickelhaupt, F. M.; Baerends, E. J.; Fonseca Guerra, C.; van Gisbergen, S. J. A.; Snijders, J. G.; Ziegler, T. Chemistry with ADF. *J. Comput. Chem.* **22**, 931–967 (2001).
- [2] Baerends, E. J.; Autschbach, J.; Bérces, A.; Bickelhaupt, F. M.; Bo, C.; Boerrigter, P. M.; Cavallo, L.; Chong, D. P.; Deng, L.; Dickson, R. M.; et al. ADF2010.01, SCM, Theoretical Chemistry, Vrije Universiteit, Amsterdam, The Netherlands, <http://www.scm.com>.
- [3] Perdew, J. P.; Burke, K.; Wang, Y. Generalized Gradient Approximation for the Exchange-Correlation Hole of a Many-Electron System. *Phys. Rev. B* **54**, 16533–16539 (1996).
- [4] Zhang, Y.; Yang, W. Comment on Generalized Gradient Approximation Made Simple. *Phys. Rev. Lett.* **80**, 89 (1998).
- [5] Perdew, J. P.; Burke, K.; Ernzerhof, M. Reply to Comment on Generalized Gradient Approximation Made Simple. *Phys. Rev. Lett.* **80**, 891 (1998).
- [6] Hammer, B.; Hansen, L. B.; Norskov, J. K. Improved Adsorption Energetics within Density-Functional Theory using Revised Perdew-Burke-Ernzerhof Functionals. *Phys. Rev. B* **59**, 7413–7421. (1999).
- [7] Grimme, S.; Antony, J.; Ehrlich, S.; Krieg, H. A consistent and accurate ab initio parameterization of density functional dispersion correction (DFT-D) for the 94 elements H-Pu. *J. Chem. Phys.* **132**, 154104 (2010).
- [8] Suh, I.; Ohta, H.; Waseda, Y. High-temperature thermal expansion of six metallic elements measured by dilatation method and X-ray diffraction. *J. Mater. Sci.* **23**, 757-760 (1988).
- [9] Pitoňák, M.; Neogrady, P.; Řezáč, J.; Jurečka, P.; Urban, M.; Hobza, P. Benzene Dimer: High-Level Wave Function and Density Functional Theory Calculations. **4**, 1829-1834 (2008).
- [10] Lomas, J. R.; Baddeley, C. J.; Tikhov, M. S.; Lambert, R. M. Ethyne Cyclization to Benzene over Cu(110). *Langmuir*. **11**, 3048-3053 (1995).
- [11] (a) Lukas, S.; Witte, G.; Wöll, C. Adsorption of acenes on flat and vicinal Cu(111) surfaces: Step induced formation of lateral order. *J. Chem. Phys.* **114**, 10123 (2001).  
(b) Xi, M.; Yang, M. X.; Jo, S. K.; Bent, B. E.; Stevens, P. Benzene adsorption on Cu(111): Formation of a stable bilayer. *J. Chem. Phys.* **101**, 9122 (1994)
- [12] Witte, G.; Lukas, S.; Bagus, P. S.; Wöll, C. Vacuum level alignment at organic/metal junctions: “Cushion” effect and the interface dipole. *Appl. Phys. Lett.* **87**, 263502 (2005)
- [13] Triguero, L.; Föhlisch, A.; Vaterlain, P.; Hasselström, J.; Weinelt, M.; Petterson, L. G. M.; Luo, Y.; Agren, H.; Nilsson, A. Direct Measurement of Donation/Back-Donation in Unsaturated Hydrocarbon Bonding to Metals. *J. Am. Chem. Soc.* **122**, 12310-12316 (2000).

- [14] Bickelhaupt, F. M.; Baerends, E. J. Kohn-Sham Density Functional Theory: Predicting and Understanding Chemistry. *Rev. Comp. Chem.* **15**, 1-86 (2000).
- [15] Hoffmann, R. A chemical and theoretical way to look at bonding on surfaces. *Rev. Mod. Phys.* **60**, 601-628 (1988).
- [16] Glassey, W. G.; Hoffmann, R. A Cinoaratuve Study of p(2x2)-CO/M(111), M=Pt,Cu,Al Chemisorption Systems. *J. Phys. Chem. B* **105**, 3245-3260 (2001).
- [17] Philipsen, P. H. T.; Baerends, E. J. The role of the Fermi surface in adsorbate-metal interaction: an energy decomposition analysis. *J. Phys. Chem. B* **110**, 12470-12479 (2006).
- [18] Glassey, W. G. Energy Partitioning Studies of CO and NO Chemisorption on the Pd(111) Surface. *J. Phy. Chem. B* **108**, 5967-5979 (2004).
- [19] Wiberg, K. B.; Rablen, P. R. Comparison of Atomic Charges Derived via Different Procedures. *J. Comput. Chem.* **14**, 1504-1518 (1993).
